# Supplementary material for: Cybersecurity features of digital medical devices: an analysis of FDA product summaries
Source: PubMed Central journal article supplement — BMJ Open. 2019 Jun 28;9(6):e025374. doi: 10.1136/bmjopen-2018-025374 (PMC6609083; doi:10.1136/bmjopen-2018-025374), 2019-06-28

# BMJ Open

BMJ Open is committed to open peer review. As part of this commitment we make the peer review history of every article we publish publicly available.

When an article is published we post the peer reviewers' comments and the authors' responses online. We also post the versions of the paper that were used during peer review. These are the versions that the peer review comments apply to.

The versions of the paper that follow are the versions that were submitted during the peer review process. They are not the versions of record or the final published versions. They should not be cited or distributed as the published version of this manuscript.

BMJ Open is an open access journal and the full, final, typeset and author-corrected version of record of the manuscript is available on our site with no access controls, subscription charges or pay-per-view fees (<http://bmjopen.bmj.com>).

If you have any questions on BMJ Open's open peer review process please email [info.bmjopen@bmj.com](mailto:info.bmjopen@bmj.com)

# BMJ Open

## Cybersecurity Features of Digital Medical Devices: An Analysis of FDA Product Summaries

|                               |                                                                                                                                                                                                                                                                                                                                                                                                                                                       |
|-------------------------------|-------------------------------------------------------------------------------------------------------------------------------------------------------------------------------------------------------------------------------------------------------------------------------------------------------------------------------------------------------------------------------------------------------------------------------------------------------|
| Journal:                      | <i>BMJ Open</i>                                                                                                                                                                                                                                                                                                                                                                                                                                       |
| Manuscript ID                 | bmjopen-2018-025374                                                                                                                                                                                                                                                                                                                                                                                                                                   |
| Article Type:                 | Research                                                                                                                                                                                                                                                                                                                                                                                                                                              |
| Date Submitted by the Author: | 11-Jul-2018                                                                                                                                                                                                                                                                                                                                                                                                                                           |
| Complete List of Authors:     | Stern, Ariel; Harvard Business School Technology and Operations Management; Harvard-MIT Center for Regulatory Science<br>Gordon, William; Brigham and Women's Hospital Department of Medicine; Harvard Medical School<br>Landman, Adam; Brigham and Women's Hospital Department of Medicine<br>Kramer, Daniel; Beth Israel Deaconess Medical Center, Richard A. and Susan F. Smith Center for Outcomes Research in Cardiology; Harvard Medical School |
| Keywords:                     | Medical Devices, Software, Cybersecurity, FDA, Regulatory Policy                                                                                                                                                                                                                                                                                                                                                                                      |
|                               |                                                                                                                                                                                                                                                                                                                                                                                                                                                       |

SCHOLARONE™  
Manuscripts

Peer Review Only

1  
2  
3 **CYBERSECURITY FEATURES OF DIGITAL MEDICAL DEVICES:**  
4  
5 **AN ANALYSIS OF FDA PRODUCT SUMMARIES**  
6  
7

8  
9 Ariel D Stern, Assistant Professor Harvard Business School, the Harvard-MIT Center for  
10 Regulatory Science, Morgan Hall 433, Soldiers Field Rd, Boston, MA 02163, astern@hbs.edu  
11

12  
13 William J Gordon, Instructor of Medicine, Division of General Internal Medicine, Brigham and  
14 Women's Hospital, Harvard Medical School, 1620 Tremont Street, Boston, MA 02120,  
15 wgordon@partners.org  
16

17  
18 Adam B Landman, Chief Information Officer, Brigham and Women's Hospital, Harvard  
19 Medical School, 75 Francis St, Boston, MA 02115, alandman@bwh.harvard.edu  
20

21  
22 Daniel B Kramer, Assistant Professor of Medicine, Harvard Medical School, Richard A. and  
23 Susan F. Smith Center for Outcomes Research in Cardiology, Beth Israel Deaconess Medical  
24 Center, Baker 4, West, 330 Brookline Ave, Boston, MA 02115, dkramer@bidmc.harvard.edu  
25

26 Correspondence to: Ariel D Stern  
27

28 Keywords: Medical Devices, Software, Cybersecurity, FDA  
29

30 Word Count: 1,850  
31  
32  
33  
34  
35  
36  
37  
38  
39  
40  
41  
42  
43  
44  
45  
46  
47  
48  
49  
50  
51  
52  
53  
54  
55  
56  
57  
58  
59  
60

## Structured Abstract

**Objectives:** In order to more clearly define the landscape of digital medical devices subject to U.S. Food and Drug Administration (FDA) oversight, this analysis leverages publicly-available regulatory documents to characterize the prevalence and trends of software and cybersecurity features in regulated medical devices.

**Design:** We analyzed data from publicly available FDA product summaries to understand the frequency and recent time trends of inclusion of software and cybersecurity content in publicly available product information.

**Setting:** The full set of regulated medical devices, approved over the years 2002-2016 included in the FDA's 510(k) and premarket approval databases.

**Primary and secondary outcome measures:** The primary outcome was the share of devices containing software that included cybersecurity content in their product summaries. Secondary outcomes were differences in these shares a) over time and b) across regulatory areas.

**Results:** Among regulated devices, 13.79% were identified as including software. Among these products, only 2.13% had product summaries that included cybersecurity content over the period studied. The overall share of devices including cybersecurity content was higher in recent years, growing from an average of 1.4% in the first decade of our sample to 5.5% in 2015 and 2016, the most recent years included. The share of devices including cybersecurity content also varied across regulatory areas from a low of 0% to a high of 22.2%.

**Conclusions:** To ensure the safest possible health care delivery environment for patients and hospitals, regulators and manufacturers should work together to make the software and cybersecurity content of new medical devices more easily accessible.

## Article Summary

### Strengths and limitations of this study

- Cybersecurity issues related to medical devices have been documented in individual cases, but the inclusion of cybersecurity content has never been considered systematically; we provide the first such analysis.
- The study also provides a new application of the use of the Medical Text Indexer – a document classification algorithm from the U.S. National Library of Medicine – for understanding the content of medical product descriptions.
- The study’s primary limitation is that because the inclusion of cybersecurity content is not mandatory in FDA product summary documents, some devices may include cybersecurity features that cannot be accounted for by this analysis.

## Introduction

The United States (US) National Research Council (NRC) defines cybersecurity as “the technologies, processes, and policies that help to prevent and/or reduce the negative impact of events...that can happen as the result of deliberate actions against information technology by a hostile or malevolent actor.”<sup>1</sup> In the US, the Cybersecurity Information Sharing Act of 2015 included health care provisions (Sec. 405), requiring that the Department of Health and Human Services to report to Congress regarding the preparedness of the health care industry in responding to cybersecurity threats, acknowledging these risks and laying out reporting requirements.<sup>2</sup> In health care delivery and health care policy, cybersecurity comes up most readily in the context of health information technology. Such technology may include stand-alone software, such as electronic health record systems, or combinations of hardware and software, such as those seen in modern pacemakers, blood glucose monitors, and computed tomography scanners. In the latter category, many digital products pose sufficient risk to patients as to require regulatory approval for use. In the US, products containing both software and hardware are regulated by the US Food and Drug Administration (FDA). Importantly, digital medical devices – those that contain software and/or digital networking capabilities – are quickly becoming embedded in all facets of medical care. However, the prevalence of software and the inclusion of cybersecurity features among already-marketed regulated medical devices have not been previously investigated.

At the same time, there have been several recent examples of software-related medical device vulnerabilities,<sup>3,4</sup> including potential use of a pacemaker remote monitoring system to issue malicious programming commands.<sup>5</sup> These devices may also place health care facilities at risk:<sup>6</sup> A recent report from a cybersecurity firm highlighted the fact that 90% of hospitals had

1  
2  
3 been targeted by cybercriminals in the past two years and that 17% of these documented attacks  
4  
5 had been facilitated by Internet-connected medical devices.<sup>7</sup> The May 2017 WannaCry  
6  
7 ransomware attack was the largest cyberattack to affect the United Kingdom's National Health  
8  
9 Service, impacting 34% of trusts and disrupting some medical devices, including a subset of  
10  
11 MRI scanners and devices to test blood and tissue samples.<sup>8,9</sup>  
12  
13

14  
15 In recognition of these risks, the FDA has issued both pre and post-market regulatory  
16  
17 guidance<sup>10,11</sup> on medical device cybersecurity while actively engaging industry and outside  
18  
19 experts in addressing post-market cybersecurity concerns. In order to more clearly define the  
20  
21 landscape of digital medical devices subject to FDA oversight, this analysis leverages publicly-  
22  
23 available FDA documents to characterize the prevalence and trends of software and  
24  
25 cybersecurity features in regulated medical devices.  
26  
27

## 30 31 **Methods**

### 32 33 *Data Sources*

34  
35 We analyzed data from publicly available FDA product summaries, identified from  
36  
37 searchable documents published by the FDA at the time of each new device's clearance or  
38  
39 approval for marketing.<sup>14,15</sup> Such summaries have supported previous analyses,<sup>16,17</sup> and, as  
40  
41 outlined by FDA guidance, these summaries contain information such as indications for use, a  
42  
43 detailed device description (including device design, material use, and physical properties),  
44  
45 contradictions/warnings/precautions, and clinical evidence supporting the regulatory assessment  
46  
47 of safety and effectiveness.<sup>18,19</sup> Along with the FDA-approved product label (with which a  
48  
49 summary will share many pieces of important information), summary documents represent key  
50  
51  
52  
53  
54  
55  
56  
57  
58  
59  
60

1  
2  
3 pieces of publicly available information about medical devices that have been granted marketing  
4  
5 approval.  
6

7  
8 We used the FDA's 510(k) and premarket approval (PMA) databases to identify all new  
9  
10 device clearances and approvals from 2002-2016, respectively<sup>14,15</sup> (see **Supplementary**  
11  
12 **Material**). In brief, under the FDA's risk-based framework for premarket evaluation,<sup>20</sup> high-  
13  
14 risk devices are evaluated under the PMA pathway, which includes demonstration of clinically-  
15  
16 relevant safety and effectiveness. By contrast, medium-risk devices are generally assessed via  
17  
18 the "510k" pathway, which evaluates whether new safety or effectiveness concerns are raised by  
19  
20 the device at issue compared to a "substantially equivalent" device already on the market.<sup>21</sup> We  
21  
22 identified the eight largest medical device categories by advisory committee of assignment,  
23  
24 which accounted for over 75%<sup>14,15</sup> of all regulated devices that came to market over this period  
25  
26 of time (see **Exhibit 1**). Modifications to already-marketed devices approved via the PMA  
27  
28 supplement pathway<sup>22</sup> were excluded.  
29  
30  
31  
32

33 We used an automated script to batch download all associated product summaries and  
34  
35 applied *ABBYY FineReader* optical character recognition software (ABBYY, Milpitas, CA) to  
36  
37 convert these Portable Document Format (PDF) files into machine-readable text files.  
38  
39  
40  
41

### 42 *Analysis Sample*

43  
44 We used the US National Institute of Health's National Library of Medicine (NLM)  
45  
46 *Medical Text Indexer*<sup>23</sup> (MTI) to identify digital devices as those referencing and/or describing  
47  
48 software in their product summaries. The MTI uses natural language processing algorithms that  
49  
50 take free text as input and provide medical subject indexing recommendations, based on the  
51  
52 MeSH® vocabulary<sup>24</sup> established by the NLM, as output. From a regulatory perspective,  
53  
54  
55  
56  
57  
58  
59  
60



1  
2  
3 products containing software must mention this in their summaries (see above). Indeed, many  
4  
5 device summaries contain a short section of the document that is dedicated to describing the  
6  
7 product's software (for example, as seen for the Medtronic MiniMed 670G Automated Insulin  
8  
9 Delivery System).<sup>25</sup> We used the sample of summaries that were flagged by the MTI as including  
10  
11 the medical subject of "software" as our analysis sample of digital devices ("software sample").  
12  
13 In sensitivity analysis, an alternative, keyword-based definition was considered and did not  
14  
15 impact findings (**Supplementary Material**). For each product in the software sample, we  
16  
17 recorded each device's FDA decision date (i.e. the year in which the product came to market), its  
18  
19 regulatory approval pathway (510(k) or PMA), and the reviewing advisory committee.  
20  
21  
22  
23  
24  
25

#### 26 *Characterization of Cybersecurity Features*

27  
28 The "cybersecurity features" of digital medical devices can take on a number of forms,  
29  
30 each of which can address the risks of actions by malevolent parties. Such cybersecurity features  
31  
32 may include characterizations or descriptions of a digital product's defensive abilities (e.g. data  
33  
34 encryption), an ability to respond to a security breach should it be attempted (e.g. antivirus  
35  
36 software), or the ability to detect a breach that has already occurred (e.g. penetration testing).  
37  
38  
39

40 We searched each of the summaries in the software sample for a pre-specified list of  
41  
42 keywords related to cybersecurity content (**Supplementary Material**) and documented use of  
43  
44 these keywords (yes/no) in each product summary. These keywords and phrases were selected *a*  
45  
46 *priori* from terminology glossaries from the US National Initiative for Cybersecurity Careers and  
47  
48 Studies (NICCS), the FDA's guidance on cybersecurity for medical devices, the US National  
49  
50 Institute of Standards and Technology (NIST 4009 / NISTIR 7298) Glossary,<sup>26</sup> and the  
51  
52 Manufacturer Disclosure Statement for Medical Device Security (MDS2), a multi-stakeholder  
53  
54  
55  
56  
57  
58  
59  
60

1  
2  
3 devised form designed to give manufacturers a mechanism of disclosing security-related product  
4 information to healthcare providers.<sup>27</sup>  
5  
6  
7  
8  
9

### 10 *Data Analysis*

11  
12 For each year, we identified the software sample and calculated the number and  
13 percentage (share) of devices that included cybersecurity content by advisory committee and  
14 overall. We compared the percentage of devices with cybersecurity content, as identified by  
15 keywords. Using chi-squared tests, we looked at differences between the two major regulatory  
16 approval pathways and in earlier versus later years.  
17  
18  
19  
20  
21  
22

23  
24 In order to validate our automated search protocol, we manually reviewed 50 summaries  
25 from the software sample that were identified as containing cybersecurity information, and 50  
26 that were identified as having no such content to confirm text scraping methods. Discrepancies  
27 were reviewed by group assent. We further validated our method of identifying devices  
28 containing software by electronically scanning all product summaries for the keyword  
29 “software” and using these results to assess the sensitivity and specificity of the MTI-defined  
30 software sample. (**Supplementary Material**).  
31  
32  
33  
34  
35  
36  
37  
38  
39

40 All analyses were conducted in STATA version 14.2 (StataCorp LLC, College Station,  
41 TX).  
42  
43  
44  
45  
46

### 47 **Results**

48  
49 A total of 36,430 new devices were identified (**Exhibit 2**) and of those, 35,794 (98.3%)  
50 had product summaries that could be converted to machine-readable text. From this sample,  
51 4,936 new devices (13.79%) were identified by the MTI as including software (9.70% of PMA  
52  
53  
54  
55  
56  
57  
58  
59  
60

1  
2  
3 devices and 13.82% of 510(k) devices. Within the software sample, we found that only 2.13% of  
4  
5 devices had product summaries that included cybersecurity content (3.45% of PMA devices and  
6  
7 2.12% of 510(k) devices, however, differences were not statistically significant [ $p=0.62$ ]).  
8  
9 Manual review confirmed that 100% of summaries included the keyword(s) found by our  
10  
11 automated program. Relative to our keyword-based validation exercise, the MTI has a sensitivity  
12  
13 of 100% and a specificity of 94.8%, making it a more conservative measure.  
14  
15

16  
17 **Exhibit 3a** presents the share of devices with software over time, while **Exhibit 3b**  
18  
19 presents the share of devices in the software sample that included cybersecurity content in their  
20  
21 product summaries over the same period. The overall share of devices including cybersecurity  
22  
23 content was higher in recent years, growing from an average of 1.4% in the first decade of our  
24  
25 sample to 5.5% in 2015 and 2016, the most recent years included ( $p = 0.0181$ ). The share of  
26  
27 devices including cybersecurity content also varied across regulatory areas from a low of 0%  
28  
29 across all years in gastroenterology/urology devices, orthopedic devices, and general/plastic  
30  
31 surgery devices, to a high of 22.2% among general hospital devices in 2016 (**Exhibit 1**).  
32  
33  
34  
35  
36  
37

### 38 **Comment**

39  
40 This study leverages a novel methodology to create an analyzable dataset from public  
41  
42 documents describing newly-marketed medical devices. We found that software is an  
43  
44 increasingly common component of newly approved or cleared devices, while cybersecurity  
45  
46 content in the devices' publicly available summaries remains rare.  
47  
48

49  
50 As more and more aspects of healthcare are digitized, the cybersecurity of our healthcare  
51  
52 infrastructure—including medical devices—will be increasingly essential to delivering safe and  
53  
54 effective care. Recent events such as the emergence of pacemaker vulnerabilities have  
55  
56  
57  
58  
59  
60

1  
2  
3 highlighted both the public health implications of information security<sup>28</sup> and importance of  
4 device security.<sup>6</sup> Additionally, the recent security flaws discovered in widely-used computer  
5 processors, highlight the fact that new threats continue to unfold<sup>29</sup> with the opportunity for  
6 significant clinical impact. Indeed, the NRC has written that “from the standpoint of an  
7 individual system or network operator, the only thing worse than being penetrated is being  
8 penetrated and not knowing about it.”<sup>1</sup> Our work is an important first step in a public, transparent  
9 understanding of the cybersecurity features included in the software embedded in moderate- and  
10 high-risk medical devices.  
11  
12  
13  
14  
15  
16  
17  
18  
19  
20

21           Importantly, product summaries may not include all relevant details of device design with  
22 respect to cybersecurity. While this information may exist in other places, such as proprietary  
23 applications or the full, confidential FDA dossier, device summaries represent some of the  
24 primary documents available for public review, and therefore play an important role in educating  
25 stakeholders, such as clinicians, purchasing managers, patients, and administrators of health care  
26 systems, about the strength of safety and effectiveness evidence when a new product comes to  
27 market.  
28  
29  
30  
31  
32  
33  
34  
35  
36

37           These findings help define the current landscape of medical device software and  
38 cybersecurity features, and suggest an opportunity to better inform healthcare professionals,  
39 those engaging in device procurement on behalf of hospitals and health care systems, and  
40 patients, on the cybersecurity protections embedded in medical devices. In an increasingly  
41 digitized health care ecosystem, manufacturers will face increasing demands for product safety  
42 in the form of cybersecurity protections. Moreover, stakeholders will increasingly seek out  
43 information about the safety features of new products. The FDA and manufacturers should work  
44 together to make the software and cybersecurity content of new products more easily accessible,  
45  
46  
47  
48  
49  
50  
51  
52  
53  
54  
55  
56  
57  
58  
59  
60

1  
2  
3  
4  
5  
6  
7  
8  
9  
10  
11  
12  
13  
14  
15  
16  
17  
18  
19  
20  
21  
22  
23  
24  
25  
26  
27  
28  
29  
30  
31  
32  
33  
34  
35  
36  
37  
38  
39  
40  
41  
42  
43  
44  
45  
46  
47  
48  
49  
50  
51  
52  
53  
54  
55  
56  
57  
58  
59  
60

and should continue to work together to determine which cybersecurity content should be disclosed and required for regulatory clearance and approval of new products moving forward.

For peer review only

1  
2  
3 **Author Contributions:** ADS designed the study in consultation with WJG, ABL, and DBK.

4  
5 ADS collected the data from public sources and performed the primary analysis. All authors had  
6  
7 full access to the data and analysis programs for this study and take responsibility for the  
8  
9 integrity of the data and the accuracy of the analysis. All authors wrote the manuscript.  
10  
11  
12

13  
14 **License:** The Corresponding Author has the right to grant on behalf of all authors and does grant  
15  
16 on behalf of all authors, an exclusive licence (or non exclusive for government employees) on a  
17  
18 worldwide basis to the BMJ Publishing Group Ltd ("BMJ"), and its Licensees to permit this  
19  
20 article (if accepted) to be published in *The BMJ's* editions and any other BMJ products and to  
21  
22 exploit all subsidiary rights, as set out in our licence.  
23  
24  
25  
26  
27

28 **Data Sharing Statement:** Statistical code and the full dataset are available at  
29  
30 <https://github.com/arieldora/SternCybersecurityContent>  
31  
32  
33  
34  
35

36 **Conflicts of Interest:** Dr. Kramer is supported by the Greenwall Faculty Scholars Program in  
37  
38 Bioethics, is a consultant to Circulatory Systems Advisory Panel of the Food and Drug  
39  
40 Administration, and has provided consulting to the Baim Institute for Clinical Research for  
41  
42 clinical trials of medical devices (unrelated to the study topic). There are no other financial or  
43  
44 commercial financial conflicts of interest related to the study topic to report.  
45  
46  
47  
48  
49

50 **Funding:** The Harvard Business School Division of Research and Faculty Development  
51  
52 supported the data collection for this study.  
53  
54  
55  
56  
57  
58  
59  
60

## References

1. National Research Council. At the Nexus of Cybersecurity and Public Policy: Some Basic Concepts and Issues [Internet]. The National Academies Press; 2014 [cited 2018 Feb 5]. Available from: <https://doi.org/10.17226/18749>
2. Burr R. S.754 - 114th Congress (2015-2016): To improve cybersecurity in the United States through enhanced sharing of information about cybersecurity threats, and for other purposes. [Internet]. 2015 [cited 2018 Apr 16]. Available from: <https://www.congress.gov/bill/114th-congress/senate-bill/754>
3. Blau M. Hospitals brace for security risks that could come with using wearables for patient care [Internet]. STAT. 2017 [cited 2018 Feb 5]. Available from: <https://www.statnews.com/2017/08/04/hospitals-security-risks-wearables/>
4. Kuchler H. Medical device makers wake up to cyber security threat. Financial Times [Internet]. 2017 Aug 1; Available from: <https://www.ft.com/content/00989b9c-7634-11e7-90c0-90a9d1bc9691>
5. Kramer DB, Fu K. Cybersecurity Concerns and Medical Devices: Lessons From a Pacemaker Advisory. JAMA. 2017 Dec 5;318(21):2077–8.
6. Fox-Brewster T. Medical Devices Hit By Ransomware For The First Time In US Hospitals [Internet]. Forbes. 2017 [cited 2018 Feb 5]. Available from: <https://www.forbes.com/sites/thomasbrewster/2017/05/17/wannacry-ransomware-hit-real-medical-devices/#4a76dbe8425c>
7. IoT guardian for the healthcare industry [Internet]. ZingBox; 2016. Available from: [http://www.zingbox.com/wp-content/uploads/2017/02/ZingBox\\_WP\\_IoT-Guardian-for-the-Healthcare-Industry.pdf](http://www.zingbox.com/wp-content/uploads/2017/02/ZingBox_WP_IoT-Guardian-for-the-Healthcare-Industry.pdf)
8. Hughes O. WannaCry impact on NHS considerably larger than previously suggested [Internet]. Digital Health. 2017 [cited 2018 Feb 5]. Available from: <https://www.digitalhealth.net/2017/10/wannacry-impact-on-nhs-considerably-larger-than-previously-suggested/>
9. Department of Health. Investigation: WannaCry cyber attack and the NHS [Internet]. 2017 October. Report No.: HC 414. Available from: <https://www.nao.org.uk/wp-content/uploads/2017/10/Investigation-WannaCry-cyber-attack-and-the-NHS.pdf>
10. Food and Drug Administration. Content of Premarket Submissions for Management of Cybersecurity in Medical Devices - Guidance for Industry and Food and Drug Administration Staff. Available from: <https://www.fda.gov/downloads/medicaldevices/deviceregulationandguidance/guidancedocuments/ucm356190.pdf>
11. Postmarket Management of Cybersecurity in Medical Devices - Guidance for Industry and Food and Drug Administration Staff. Available from:

1  
2  
3 <https://www.fda.gov/downloads/medicaldevices/deviceregulationandguidance/guidancedocuments/ucm482022.pdf>

6 12. Food and Drug Administration. Cybersecurity. 2018 Feb 2; Available from:  
7 <https://www.fda.gov/MedicalDevices/DigitalHealth/ucm373213.htm>

9 13. Food and Drug Administration. Digital Health Software Precertification (Pre-Cert)  
10 Program. 2017 Nov 15; Available from:  
11 <https://www.fda.gov/MedicalDevices/DigitalHealth/DigitalHealthPreCertProgram/Default.htm>

13 14. 510(k) Premarket Notification. 2017; Available from:  
14 <https://www.accessdata.fda.gov/scripts/cdrh/cfdocs/cfPMN/pmn.cfm>

16 15. Premarket Approval (PMA). 2018; Available from:  
17 <https://www.accessdata.fda.gov/scripts/cdrh/cfdocs/cfPMA/pma.cfm>

19 16. Zheng SY, Dhruva SS, Redberg RF. Characteristics of Clinical Studies Used for US Food  
20 and Drug Administration Approval of High-Risk Medical Device Supplements. JAMA. 2017  
21 Aug 15;3187:619–25.

23 17. Dhruva SS, Bero LA, Redberg RF. Strength of study evidence examined by the FDA in  
24 premarket approval of cardiovascular devices. JAMA. 2009 Dec 23;302(24):2679–85.

26 18. Content of a 510(k). 2017 Oct 31; Available from:  
27 [https://www.fda.gov/MedicalDevices/DeviceRegulationandGuidance/HowtoMarketYourDevice/PremarketSubmissions/PremarketNotification510k/ucm142651.htm#link\\_7](https://www.fda.gov/MedicalDevices/DeviceRegulationandGuidance/HowtoMarketYourDevice/PremarketSubmissions/PremarketNotification510k/ucm142651.htm#link_7)

29 19. PMA Application Contents. 2018 Feb 2; Available from:  
30 <https://www.fda.gov/MedicalDevices/DeviceRegulationandGuidance/HowtoMarketYourDevice/PremarketSubmissions/PremarketApprovalPMA/ucm050289.htm#ssed>

32 20. Kramer DB, Kesselheim AS. User Fees and Beyond — The FDA Safety and Innovation  
33 Act of 2012. N Engl J Med. 2012 Oct 4;367(14):1277–9.

35 21. Kramer DB, Xu S, Kesselheim AS. Regulation of Medical Devices in the United States  
36 and European Union. N Engl J Med. 2012 Mar 1;366(9):848–55.

38 22. Rome BN, Kramer DB, Kesselheim AS. FDA approval of cardiac implantable electronic  
39 devices via original and supplement premarket approval pathways, 1979-2012. JAMA. 2014 Jan  
40 22;311(4):385–91.

42 23. NLM Medical Text Indexer (MTI). 2018; Available from: <https://ii.nlm.nih.gov/MTI>

44 24. MeSH [Internet]. [cited 2018 Feb 5]. Available from: <https://www.ncbi.nlm.nih.gov/mesh>

46 25. Summary of Safety and Effectiveness Data (SSED) [Internet]. Available from:  
47 [https://www.accessdata.fda.gov/cdrh\\_docs/pdf10/P100034b.pdf](https://www.accessdata.fda.gov/cdrh_docs/pdf10/P100034b.pdf)

49 26. Kissel R. Glossary of Key Information Security Terms [Internet]. 2013 p. 1–218.  
50 Available from: <http://nvlpubs.nist.gov/nistpubs/ir/2013/NIST.IR.7298r2.pdf>



- 1  
2  
3 27. Manufacturer Disclosure Statement for Medical Device Security (MDS2). 2017;  
4 Available from: <http://www.himss.org/resourcelibrary/MDS2>  
5  
6 28. Gordon WJ, Fairhall A, Landman A. Threats to Information Security — Public Health  
7 Implications. *N Engl J Med*. 2017 Aug 24;377(8):707–9.  
8  
9 29. Metz C, Perloth N. Researchers Discover Two Major Flaws in the World’s Computers.  
10 The New York Times [Internet]. 2018 Jan 3 [cited 2018 Apr 17]; Available from:  
11 <https://www.nytimes.com/2018/01/03/business/computer-flaws.html>  
12  
13  
14  
15  
16  
17  
18  
19  
20  
21  
22  
23  
24  
25  
26  
27  
28  
29  
30  
31  
32  
33  
34  
35  
36  
37  
38  
39  
40  
41  
42  
43  
44  
45  
46  
47  
48  
49  
50  
51  
52  
53  
54  
55  
56  
57  
58  
59  
60

For peer review only

**Table 1: Number of devices with machine-readable summaries by FDA/CDRH Advisory Committee and year, share with software and share of software sample with cybersecurity content by Advisory Committee**

|                                                     | FDA/CDRH Advisory Committee |                     |             |                                |                       |                 |                |                               |        | Totals |
|-----------------------------------------------------|-----------------------------|---------------------|-------------|--------------------------------|-----------------------|-----------------|----------------|-------------------------------|--------|--------|
|                                                     | Clinical Chemistry (CH)     | Cardiovascular (CV) | Dental (DE) | Gastroenterology, Urology (GU) | General Hospital (HO) | Orthopedic (OR) | Radiology (RA) | General, Plastic Surgery (SU) |        |        |
| Year                                                |                             |                     |             |                                |                       |                 |                |                               |        |        |
| 2002                                                | 216                         | 436                 | 318         | 215                            | 328                   | 403             | 290            | 367                           | 2573   |        |
| 2003                                                | 192                         | 441                 | 295         | 233                            | 329                   | 389             | 329            | 357                           | 2565   |        |
| 2004                                                | 204                         | 395                 | 284         | 195                            | 270                   | 464             | 345            | 319                           | 2476   |        |
| 2005                                                | 155                         | 389                 | 245         | 166                            | 262                   | 480             | 310            | 331                           | 2338   |        |
| 2006                                                | 197                         | 412                 | 293         | 142                            | 244                   | 442             | 338            | 362                           | 2430   |        |
| 2007                                                | 153                         | 358                 | 283         | 160                            | 257                   | 444             | 271            | 319                           | 2245   |        |
| 2008                                                | 149                         | 387                 | 279         | 139                            | 207                   | 477             | 325            | 370                           | 2333   |        |
| 2009                                                | 130                         | 442                 | 268         | 155                            | 254                   | 432             | 290            | 316                           | 2287   |        |
| 2010                                                | 121                         | 390                 | 245         | 157                            | 280                   | 428             | 235            | 312                           | 2168   |        |
| 2011                                                | 163                         | 428                 | 258         | 141                            | 241                   | 542             | 347            | 285                           | 2405   |        |
| 2012                                                | 155                         | 426                 | 240         | 166                            | 282                   | 551             | 344            | 302                           | 2466   |        |
| 2013                                                | 185                         | 428                 | 235         | 153                            | 202                   | 554             | 346            | 301                           | 2404   |        |
| 2014                                                | 130                         | 400                 | 225         | 199                            | 245                   | 583             | 385            | 342                           | 2509   |        |
| 2015                                                | 108                         | 392                 | 244         | 179                            | 174                   | 575             | 340            | 322                           | 2334   |        |
| 2016                                                | 95                          | 368                 | 230         | 171                            | 204                   | 464             | 375            | 354                           | 2261   |        |
| <b>Totals</b>                                       | 2353                        | 6092                | 3942        | 2571                           | 3779                  | 7228            | 4870           | 4959                          | 35794  |        |
| Share with software ("software sample")             | 9.14%                       | 18.99%              | 4.59%       | 8.01%                          | 4.97%                 | 1.36%           | 52.28%         | 6.96%                         | 13.79% |        |
| Share of software sample with cybersecurity content | 7.91%                       | 2.51%               | 1.66%       | 0.00%                          | 2.13%                 | 0.00%           | 2.04%          | 0.00%                         | 2.13%  |        |

1  
2  
3  
4  
5  
6  
7  
8  
9  
10  
11  
12  
13  
14  
15  
16  
17  
18  
19  
20  
21  
22  
23  
24  
25  
26  
27  
28  
29  
30  
31  
32  
33  
34  
35  
36  
37  
38  
39  
40  
41  
42  
43  
44  
45  
46  
47  
48  
49  
50  
51  
52  
53  
54  
55  
56  
57  
58  
59  
60

**CYBERSECURITY FEATURES OF DIGITAL MEDICAL DEVICES:  
AN ANALYSIS OF FDA PRODUCT SUMMARIES**

Accompanying figures

For peer review only

**Figure 1. Assembly of analysis sample and results**

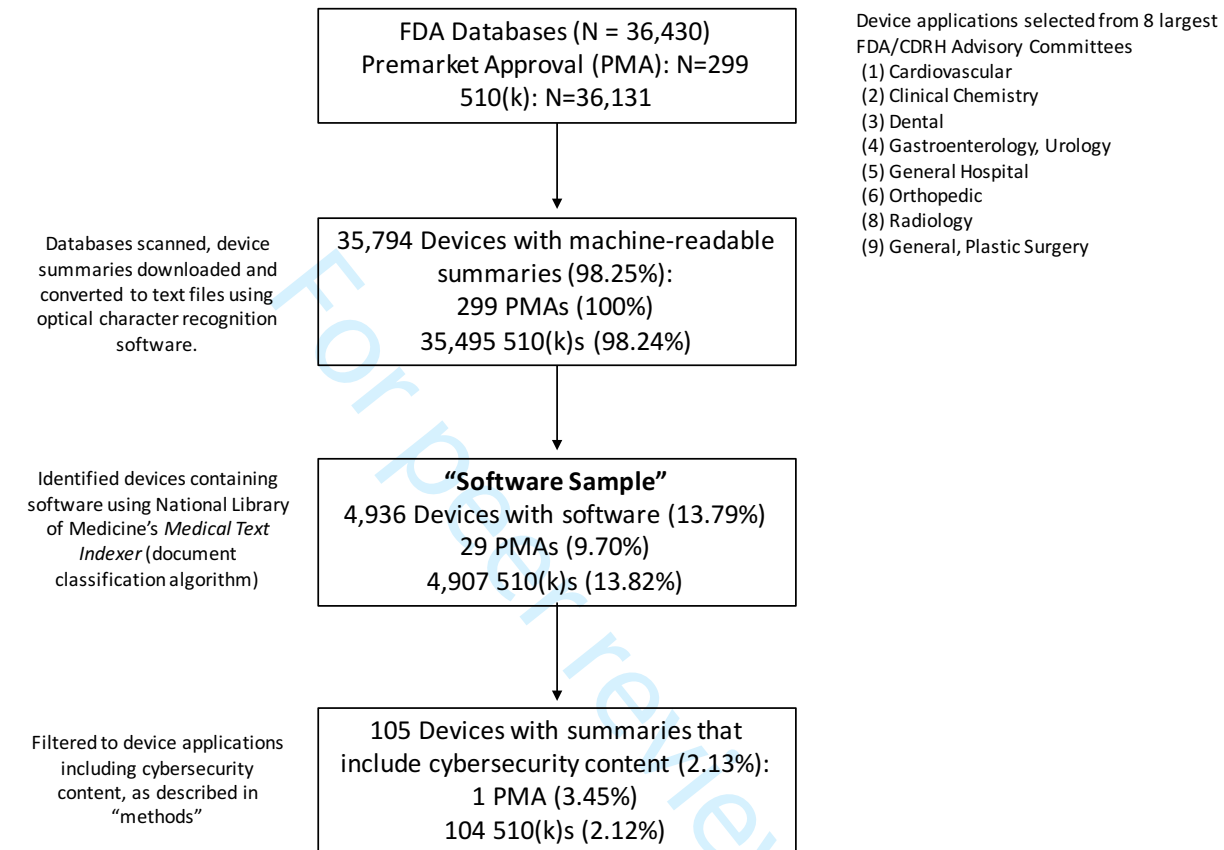

1  
2  
3  
4  
5  
6  
7  
8  
9  
10  
11  
12  
13  
14  
15  
16  
17  
18  
19  
20  
21  
22  
23  
24  
25  
26  
27  
28  
29  
30  
31  
32  
33  
34  
35  
36  
37  
38  
39  
40  
41  
42  
43  
44  
45  
46  
47  
48  
49  
50  
51  
52  
53  
54  
55  
56  
57  
58  
59  
60

**Figure 2**

Figure 2a

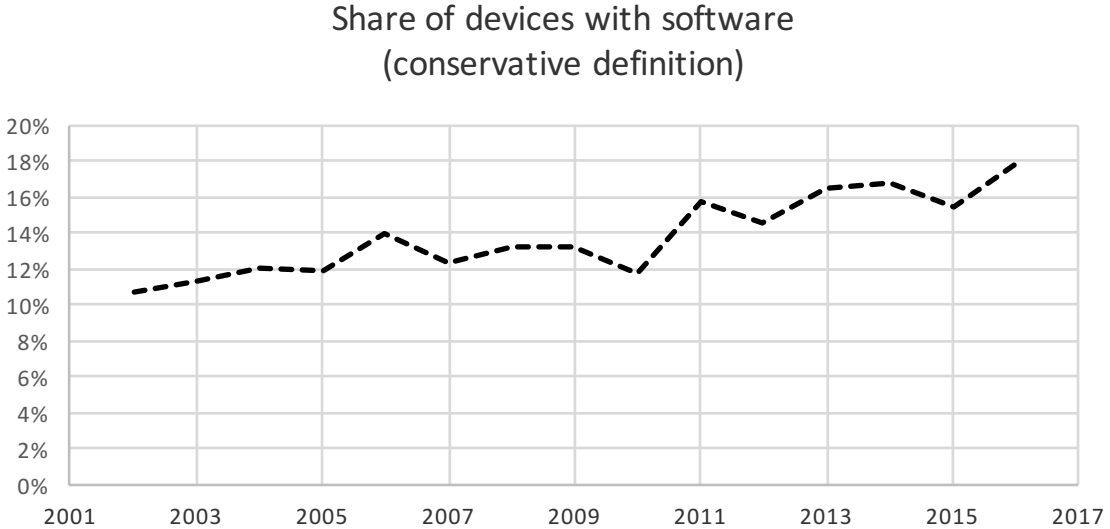

Figure 2b

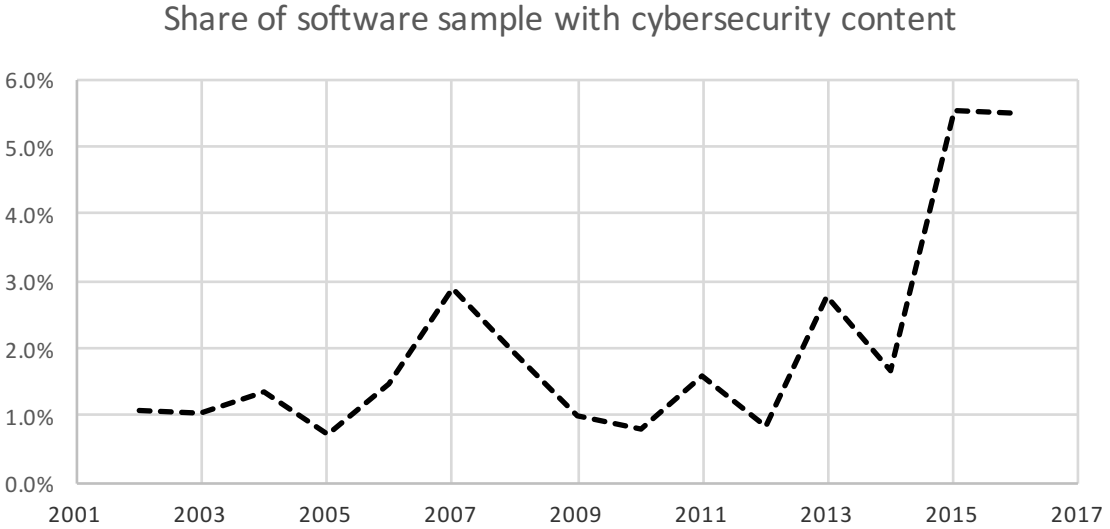

## Supplementary Material

### I. Processing Using the Medical Text Indexer (MTI)

We sent each of our optical character recognition-processed text files to the MTI and recorded which summaries were classified as being related to software in the MeSH® Tree (ontology). We flagged all products whose summaries were assigned to the “software” MeSH® term, number L01.224.900.

### II. Sensitivity Analysis

In sensitivity analyses we considered an alternate method of identifying devices containing software. For this exercise, we electronically scanned each product summary for the keyword “software” and recorded whether the word “software” appeared anywhere within a device’s product summary (i.e. at least once in the document).

We expected that the MTI-driven method of identifying the “software sample” would have a high sensitivity but a lower specificity relative to the keyword-based method for the following reason: in order for a text document to be flagged by the MTI’s algorithm as being related to the subject of “software” the text document would need describe relevant software content in some detail – i.e. often beyond simply utilizing the keyword “software” at least once.

Indeed, the keyword-based method of identifying software products captured 100% of the products that were identified as including software using the MTI results, but also identified additional products that employ the word “software” in their product summaries at least once (**Supplementary Table**).

Relative to the keyword method, we conclude that the MTI-based method of identifying software products had a 100% sensitivity, but only a 94.8% specificity in our sample. Given the high sensitivity of this method, the MTI-based software sample is the more conservative method for identifying devices with software. However, alternative results using the keyword-based definition are highly similar to those obtained using the MTI-based definition. The total share of the software device sample that includes cybersecurity content is statistically indistinguishable in every year of the sample and visibly similar over time (**Supplementary Table and Supplementary Figure**)

### Supplementary Table: Comparison of MTI and Keyword-based Methods of Identifying Software over Time

| Year   | Total Devices | Software sample (MTI defined) | Software sample (keyword defined) | Total devices with cybersecurity content (MTI) | % with cybersecurity content (MTI sample) | Total devices with cybersecurity content (keyword sample) | % with cybersecurity content (keyword) |
|--------|---------------|-------------------------------|-----------------------------------|------------------------------------------------|-------------------------------------------|-----------------------------------------------------------|----------------------------------------|
| 2002   | 2573          | 275                           | 318                               | 3                                              | 1.09%                                     | 3                                                         | 0.94%                                  |
| 2003   | 2565          | 289                           | 347                               | 3                                              | 1.04%                                     | 4                                                         | 1.15%                                  |
| 2004   | 2476          | 298                           | 350                               | 4                                              | 1.34%                                     | 4                                                         | 1.14%                                  |
| 2005   | 2338          | 277                           | 323                               | 2                                              | 0.72%                                     | 3                                                         | 0.93%                                  |
| 2006   | 2430          | 339                           | 397                               | 5                                              | 1.47%                                     | 5                                                         | 1.26%                                  |
| 2007   | 2245          | 276                           | 314                               | 8                                              | 2.90%                                     | 8                                                         | 2.55%                                  |
| 2008   | 2333          | 309                           | 371                               | 6                                              | 1.94%                                     | 8                                                         | 2.16%                                  |
| 2009   | 2287          | 303                           | 373                               | 3                                              | 0.99%                                     | 3                                                         | 0.80%                                  |
| 2010   | 2168          | 254                           | 356                               | 2                                              | 0.79%                                     | 5                                                         | 1.40%                                  |
| 2011   | 2405          | 380                           | 524                               | 6                                              | 1.58%                                     | 7                                                         | 1.34%                                  |
| 2012   | 2466          | 357                           | 526                               | 3                                              | 0.84%                                     | 6                                                         | 1.14%                                  |
| 2013   | 2404          | 395                           | 597                               | 11                                             | 2.78%                                     | 15                                                        | 2.51%                                  |
| 2014   | 2509          | 421                           | 635                               | 7                                              | 1.66%                                     | 17                                                        | 2.68%                                  |
| 2015   | 2334          | 361                           | 636                               | 20                                             | 5.54%                                     | 33                                                        | 5.19%                                  |
| 2016   | 2261          | 402                           | 721                               | 22                                             | 5.47%                                     | 43                                                        | 5.96%                                  |
| Totals | 35794         | 4936                          | 6788                              | 105                                            | 2.13%                                     | 164                                                       | 2.42%                                  |

Supplementary Figure: comparison of main results using alternative method of identifying the software sample

Share of devices with cybersecurity content:  
considering alternate definition of "software sample"

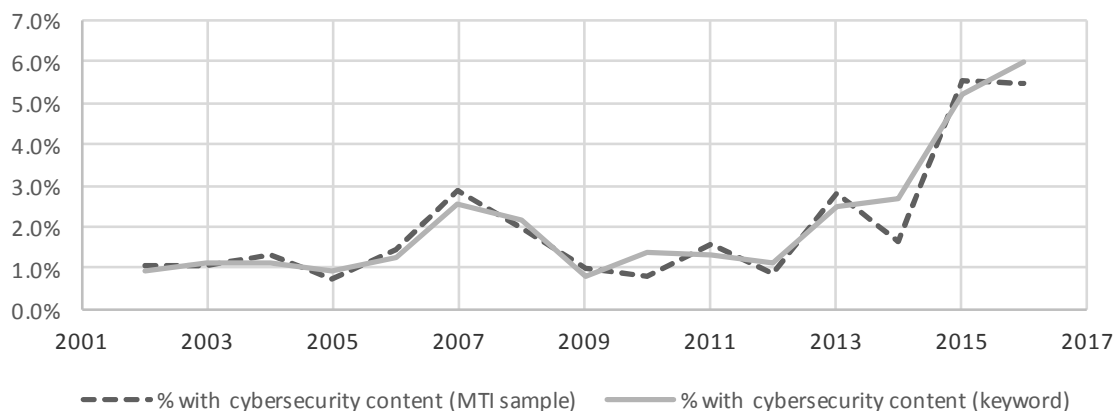

## List of keywords related to cybersecurity content:

| Source       | Term                                                      | Allowable alternative(s)                                           |
|--------------|-----------------------------------------------------------|--------------------------------------------------------------------|
| NICCS        | access control                                            |                                                                    |
| NICCS        | active attack                                             |                                                                    |
| NICCS        | air gap                                                   |                                                                    |
| NICCS        | antispymware software                                     | anti-spyware software, anti-spyware, antispymware                  |
| NICCS        | antivirus software                                        | anti-virus software, anti-virus, antivirus                         |
| NICCS        | asymmetric cryptography                                   |                                                                    |
| NICCS        | cipher                                                    |                                                                    |
| NICCS        | ciphertext                                                |                                                                    |
| NICCS        | computer network defense                                  |                                                                    |
| NICCS        | computer network defense analysis                         |                                                                    |
| NICCS        | computer network defense infrastructure support           |                                                                    |
| NICCS        | computer security incident                                |                                                                    |
| NICCS        | cryptanalysis                                             |                                                                    |
| NICCS        | cryptographic algorithm                                   |                                                                    |
| NICCS        | cryptography                                              |                                                                    |
| NICCS        | cyber ecosystem                                           |                                                                    |
| NICCS        | cyber exercise                                            |                                                                    |
| NICCS        | cyber incident                                            | cyber-incident                                                     |
| NICCS        | cyber incident response plan                              |                                                                    |
| NICCS        | cyber infrastructure                                      | cyber-infrastructure                                               |
| NICCS        | cybersecurity                                             | cyber-security                                                     |
| NICCS        | data breach                                               |                                                                    |
| NICCS        | data leakage                                              |                                                                    |
| NICCS        | data theft                                                | data-theft                                                         |
| NICCS        | decrypt                                                   |                                                                    |
| NICCS        | decryption                                                |                                                                    |
| NICCS        | denial of service                                         | denial-of-service                                                  |
| NICCS        | designed-in security                                      | designed in security                                               |
| NICCS        | digital forensics                                         |                                                                    |
| NICCS        | distributed denial of service                             | distributed denial-of-service, DDOS, D.D.O.S.                      |
| NICCS        | dynamic attack surface                                    |                                                                    |
| NICCS        | encrypt                                                   |                                                                    |
| NICCS        | encryption                                                |                                                                    |
| NICCS        | enterprise risk management                                |                                                                    |
| NICCS        | exploitation analysis                                     |                                                                    |
| NICCS        | hacker                                                    | hacking                                                            |
| NICCS        | identity and access management                            |                                                                    |
| NICCS        | information security policy                               |                                                                    |
| NICCS        | information system resilience                             |                                                                    |
| NICCS        | Information Systems Security Operations                   | Information Systems Security                                       |
| NICCS        | intrusion detection                                       |                                                                    |
| NICCS        | malicious code                                            |                                                                    |
| NICCS        | malware                                                   |                                                                    |
| NICCS        | NICCS                                                     | National Initiative for Cybersecurity Careers and Study            |
| NICCS        | penetration testing                                       |                                                                    |
| NICCS        | phishing                                                  |                                                                    |
| NICCS        | security incident                                         |                                                                    |
| NICCS        | security policy                                           |                                                                    |
| NICCS        | spyware                                                   | spy-ware                                                           |
| NICCS        | symmetric cryptography                                    |                                                                    |
| NICCS        | symmetric encryption algorithm                            |                                                                    |
| NICCS        | symmetric key                                             |                                                                    |
| NICCS        | systems security architecture                             |                                                                    |
| NICCS        | threat assessment                                         |                                                                    |
| NICCS        | virus                                                     |                                                                    |
| FDA Guidance | cybersecurity routine updates and patches                 | cybersecurity routine updates, cybersecurity routine patches       |
| FDA Guidance | cybersecurity signal                                      |                                                                    |
| FDA Guidance | exploit                                                   |                                                                    |
| FDA Guidance | Information Sharing Analysis Organizations                | ISAO, ISAOs                                                        |
| FDA Guidance | NIST                                                      | National Institute of Standards and Technology                     |
| FDA Guidance | NIST Framework                                            | NIST Framework for Improving Critical Infrastructure Cybersecurity |
| FDA Guidance | Postmarket Management of Cybersecurity in Medical Devices | post-market management of cybersecurity in medical devices         |
| FDA Guidance | Protected Critical Infrastructure Information             | PCI                                                                |



# BMJ Open

## Cybersecurity Features of Digital Medical Devices: An Analysis of FDA Product Summaries

|                                 |                                                                                                                                                                                                                                                                                                                                                                                                                                                       |
|---------------------------------|-------------------------------------------------------------------------------------------------------------------------------------------------------------------------------------------------------------------------------------------------------------------------------------------------------------------------------------------------------------------------------------------------------------------------------------------------------|
| Journal:                        | <i>BMJ Open</i>                                                                                                                                                                                                                                                                                                                                                                                                                                       |
| Manuscript ID                   | bmjopen-2018-025374.R1                                                                                                                                                                                                                                                                                                                                                                                                                                |
| Article Type:                   | Research                                                                                                                                                                                                                                                                                                                                                                                                                                              |
| Date Submitted by the Author:   | 08-Feb-2019                                                                                                                                                                                                                                                                                                                                                                                                                                           |
| Complete List of Authors:       | Stern, Ariel; Harvard Business School Technology and Operations Management; Harvard-MIT Center for Regulatory Science<br>Gordon, William; Brigham and Women's Hospital Department of Medicine; Harvard Medical School<br>Landman, Adam; Brigham and Women's Hospital Department of Medicine<br>Kramer, Daniel; Beth Israel Deaconess Medical Center, Richard A. and Susan F. Smith Center for Outcomes Research in Cardiology; Harvard Medical School |
| <b>Primary Subject Heading</b>: | Health informatics                                                                                                                                                                                                                                                                                                                                                                                                                                    |
| Secondary Subject Heading:      | Health policy, Pharmacology and therapeutics                                                                                                                                                                                                                                                                                                                                                                                                          |
| Keywords:                       | Medical Devices, Software, Cybersecurity, FDA, Regulatory Policy                                                                                                                                                                                                                                                                                                                                                                                      |
|                                 |                                                                                                                                                                                                                                                                                                                                                                                                                                                       |

SCHOLARONE™  
Manuscripts

1  
2  
3 **CYBERSECURITY FEATURES OF DIGITAL MEDICAL DEVICES:**  
4  
5 **AN ANALYSIS OF FDA PRODUCT SUMMARIES**  
6  
7

8  
9 Ariel D Stern, Assistant Professor Harvard Business School and the Harvard-MIT Center for  
10 Regulatory Science, Morgan Hall 433, Soldiers Field Rd, Boston, MA 02163, astern@hbs.edu  
11

12  
13 William J Gordon, Instructor of Medicine, Division of General Internal Medicine, Brigham and  
14 Women's Hospital, Harvard Medical School, 1620 Tremont Street, Boston, MA 02120,  
15 wgordon@partners.org  
16

17  
18 Adam B Landman, Chief Information Officer, Brigham and Women's Hospital, Harvard  
19 Medical School, 75 Francis St, Boston, MA 02115, alandman@bwh.harvard.edu  
20

21  
22 Daniel B Kramer, Assistant Professor of Medicine, Harvard Medical School, Richard A. and  
23 Susan F. Smith Center for Outcomes Research in Cardiology, Beth Israel Deaconess Medical  
24 Center, Baker 4, West, 330 Brookline Ave, Boston, MA 02115, dkramer@bidmc.harvard.edu  
25

26 Correspondence to: Ariel D Stern  
27

28 Keywords: Medical Devices, Software, Cybersecurity, FDA  
29

30 Word Count: 2522  
31  
32  
33  
34  
35  
36  
37  
38  
39  
40  
41  
42  
43  
44  
45  
46  
47  
48  
49  
50  
51  
52  
53  
54  
55  
56  
57  
58  
59  
60

## Structured Abstract

**Objectives:** In order to more clearly define the landscape of digital medical devices subject to U.S. Food and Drug Administration (FDA) oversight, this analysis leverages publicly-available regulatory documents to characterize the prevalence and trends of software and cybersecurity features in regulated medical devices.

**Design:** We analyzed data from publicly available FDA product summaries to understand the frequency and recent time trends of inclusion of software and cybersecurity content in publicly available product information.

**Setting:** The full set of regulated medical devices, approved over the years 2002-2016 included in the FDA's 510(k) and premarket approval databases.

**Primary and secondary outcome measures:** The primary outcome was the share of devices containing software that included cybersecurity content in their product summaries. Secondary outcomes were differences in these shares a) over time and b) across regulatory areas.

**Results:** Among regulated devices, 13.79% were identified as including software. Among these products, only 2.13% had product summaries that included cybersecurity content over the period studied. The overall share of devices including cybersecurity content was higher in recent years, growing from an average of 1.4% in the first decade of our sample to 5.5% in 2015 and 2016, the most recent years included. The share of devices including cybersecurity content also varied across regulatory areas from a low of 0% to a high of 22.2%.

**Conclusions:** To ensure the safest possible health care delivery environment for patients and hospitals, regulators and manufacturers should work together to make the software and cybersecurity content of new medical devices more easily accessible.

## Article Summary

### Strengths and limitations of this study

- Cybersecurity issues related to medical devices have been documented in a number of individual cases, but the inclusion of cybersecurity content has never been considered systematically; we provide the first such analysis.
- The study also provides a new application of the use of the Medical Text Indexer – a document classification algorithm from the U.S. National Library of Medicine – for understanding the content of medical product descriptions.
- The study’s primary limitation is that because the inclusion of cybersecurity content is not currently mandatory in FDA product summary documents, some devices may include cybersecurity features that cannot be accounted for by this analysis.

## Introduction

The United States (US) National Research Council (NRC) defines cybersecurity as “the technologies, processes, and policies that help to prevent and/or reduce the negative impact of events...that can happen as the result of deliberate actions against information technology by a hostile or malevolent actor.”<sup>1</sup> In the US, the Cybersecurity Information Sharing Act of 2015 included health care provisions (Sec. 405), requiring the Department of Health and Human Services to report to Congress regarding the preparedness of the health care industry in responding to cybersecurity threats, acknowledging these risks and laying out reporting requirements.<sup>2</sup>

In health care delivery and health care policy, cybersecurity comes up most readily in the context of health information technology. Such technology may include stand-alone software, such as electronic health record systems, or combinations of hardware and software, such as those seen in modern pacemakers, blood glucose monitors, and computed tomography scanners. In the latter category, many digital products pose sufficient risk to patients as to require regulatory approval for use. In the US, products containing both software and hardware are regulated by the US Food and Drug Administration (FDA). Importantly, digital medical devices – those that contain software and/or digital networking capabilities – are quickly becoming embedded in all facets of medical care. However, the prevalence of software and the inclusion of cybersecurity features among already-marketed regulated medical devices have not been previously investigated.

At the same time, there have been several recent examples of software-related medical device vulnerabilities,<sup>3,4</sup> including potential use of a pacemaker remote monitoring system to issue malicious programming commands.<sup>5</sup> These devices may also place health care facilities at

1  
2  
3 risk:<sup>6</sup> A recent report from a cybersecurity firm highlighted the fact that 90% of hospitals had  
4 been targeted by cybercriminals in the past two years and that 17% of these documented attacks  
5 had been facilitated by Internet-connected medical devices.<sup>7</sup> The May 2017 WannaCry  
6 ransomware attack was the largest cyberattack to affect the United Kingdom's National Health  
7 Service, impacting 34% of trusts and disrupting some medical devices, including a subset of  
8 MRI scanners and devices to test blood and tissue samples.<sup>8,9</sup>

9  
10 In recognition of these risks, the FDA has issued both pre and post-market regulatory  
11 guidance<sup>10,11</sup> on medical device cybersecurity while actively engaging industry and outside  
12 experts in addressing post-market cybersecurity concerns. In order to more clearly define the  
13 landscape of digital medical devices subject to FDA oversight, this analysis leverages publicly-  
14 available FDA documents to characterize the prevalence and trends of software and  
15 cybersecurity features in regulated medical devices.

## 16 17 18 19 20 21 22 23 24 25 26 27 28 29 30 31 32 33 **Methods**

### 34 35 *Data Sources*

36  
37 We analyzed data from publicly available FDA product summaries, identified from  
38 searchable documents published by the FDA at the time of each new device's clearance or  
39 approval for marketing.<sup>12,13</sup> Such summaries have supported previous analyses,<sup>14,15</sup> and, as  
40 outlined by FDA guidance, these summaries contain information such as indications for use, a  
41 detailed device description (including device design, material use, and physical properties),  
42 contradictions/warnings/precautions, and clinical evidence supporting the regulatory assessment  
43 of safety and effectiveness.<sup>16,17</sup> Along with the FDA-approved product label (with which a  
44 summary will share many pieces of important information), summary documents represent key  
45  
46  
47  
48  
49  
50  
51  
52  
53  
54  
55  
56  
57  
58  
59  
60

1  
2  
3 pieces of publicly available information about medical devices that have been granted marketing  
4 approval or clearance in the United States.  
5  
6

7  
8 We used the FDA's 510(k) and premarket approval (PMA) databases to identify all new  
9 device clearances and approvals from 2002-2016, respectively<sup>14,15</sup> (see **Table 1** in the  
10 **Supplementary Material**). In brief, under the FDA's risk-based framework for premarket  
11 evaluation, high-risk devices are evaluated under the PMA pathway, which includes  
12 demonstration of clinically-relevant safety and effectiveness. By contrast, medium-risk devices  
13 are generally assessed via the "510k" pathway, which evaluates whether new safety or  
14 effectiveness concerns are raised by the device at issue compared to a "substantially equivalent"  
15 device already on the market.<sup>18,19</sup> **Figure 1** of the **Supplementary Material** presents a brief  
16 overview of these pathways and their typical components. We identified the eight largest medical  
17 device categories by advisory committee of assignment. Advisory committees correspond largely  
18 to medical specialties (e.g. committees exist for cardiovascular, radiological, and orthopedic  
19 devices) and the eight largest committees accounted for over 75%<sup>14,15</sup> of all regulated devices  
20 that came to market over this period of time (see **Figure 1** for a summary of how the analysis  
21 sample was identified). Modifications to already-marketed devices approved via the "PMA  
22 supplement" pathway<sup>20</sup> were excluded.  
23  
24  
25  
26  
27  
28  
29  
30  
31  
32  
33  
34  
35  
36  
37  
38  
39  
40  
41

42 We used an automated script to batch download all associated product summaries and  
43 applied *ABBYY FineReader* optical character recognition software (ABBYY, Milpitas, CA) to  
44 convert these Portable Document Format (PDF) files into machine-readable text files.  
45  
46  
47  
48  
49  
50

### 51 *Analysis Sample*

52  
53  
54  
55  
56  
57  
58  
59  
60

1  
2  
3 We used the US National Institute of Health’s National Library of Medicine (NLM)  
4 *Medical Text Indexer*<sup>21</sup> (MTI) to identify digital devices as those referencing and/or describing  
5 software in their product summaries. The MTI uses natural language processing algorithms that  
6 take free text as input and provide medical subject indexing recommendations, based on the  
7 MeSH® vocabulary<sup>22</sup> established by the NLM, as output. From a regulatory perspective,  
8 products containing software must describe this in their summaries (see above). Indeed, many  
9 device summaries contain a short section of the document that is dedicated to describing the  
10 product’s software (for example, as seen for the Medtronic MiniMed 670G Automated Insulin  
11 Delivery System).<sup>23</sup> We used the sample of summaries that were flagged by the MTI as  
12 including the medical subject of “software” as our analysis sample of digital devices (“software  
13 sample”). In sensitivity analysis, an alternative, keyword-based definition was considered and  
14 did not impact findings (**Table 1 and Figure 2 of Supplementary Material**). For each product  
15 in the software sample, we recorded each device’s FDA decision date (i.e. the year in which the  
16 product came to market), its regulatory approval pathway (510(k) or PMA), and the reviewing  
17 advisory committee.  
18  
19  
20  
21  
22  
23  
24  
25  
26  
27  
28  
29  
30  
31  
32  
33  
34  
35  
36  
37  
38  
39

#### 40 *Characterization of Cybersecurity Features*

41  
42 The “cybersecurity features” of digital medical devices can take on a number of forms,  
43 each of which can address the risks of actions by malevolent parties. Such cybersecurity features  
44 may include characterizations or descriptions of a digital product’s defensive abilities (e.g. data  
45 encryption), an ability to respond to a security breach should it be attempted (e.g. antivirus  
46 software), or the ability to detect a breach that has already occurred (e.g. penetration testing).  
47  
48  
49  
50  
51  
52  
53  
54  
55  
56  
57  
58  
59  
60



1  
2  
3 We searched each of the summaries in the software sample for a pre-specified list of  
4 keywords related to cybersecurity content (**Table 2 of Supplementary Material**) and  
5  
6 documented use of these keywords (yes/no) in each product summary. These keywords and  
7  
8 phrases were selected *a priori* from terminology glossaries from the US National Initiative for  
9  
10 Cybersecurity Careers and Studies (NICCS), the FDA's guidance on cybersecurity for medical  
11  
12 devices, the US National Institute of Standards and Technology (NIST 4009 / NISTIR 7298)  
13  
14 Glossary,<sup>24</sup> and the Manufacturer Disclosure Statement for Medical Device Security (MDS2), a  
15  
16 multi-stakeholder devised form designed to give manufacturers a mechanism of disclosing  
17  
18 security-related product information to healthcare providers.<sup>25</sup>  
19  
20  
21  
22  
23  
24  
25

### 26 *Patient and Public Involvement*

27  
28 Patients were not directly involved in the design of this retrospective study of publicly-  
29  
30 available regulatory documents. However, popular media accounts of recent cybersecurity  
31  
32 concerns in medical devices has brought this previously-obscure topic to the attention of a wide  
33  
34 public audience, particularly the millions of patients living with potentially affected devices.<sup>26-28</sup>  
35  
36  
37  
38  
39

### 40 *Data Analysis*

41  
42 For each year, we identified the software sample and calculated the number and  
43  
44 percentage (share) of devices that included cybersecurity content by advisory committee and  
45  
46 overall. We compared the percentage of devices with cybersecurity content, as identified by  
47  
48 keywords. Using chi-squared tests, we looked at differences between the two major regulatory  
49  
50 approval pathways and in earlier versus later years.  
51  
52  
53  
54  
55  
56  
57  
58  
59  
60

1  
2  
3 In order to validate our automated search protocol, we manually reviewed 100  
4 summaries. We selected 50 summaries from the software sample that were identified as  
5 containing cybersecurity information, and 50 that were identified as having no such content to  
6 confirm text scraping methods. Discrepancies were reviewed by group assent. We further  
7 validated our method of identifying devices containing software by electronically scanning all  
8 product summaries for the keyword “software” and using these results to assess the sensitivity  
9 and specificity of the MTI-defined software sample. (**Supplementary Material**).

10  
11  
12  
13  
14  
15  
16  
17  
18  
19 All statistical analyses were conducted in STATA version 14.2 (StataCorp LLC, College  
20 Station, TX).

## 21 22 23 24 25 26 **Results**

27  
28 A total of 36,430 new devices were identified (**Figure 1**) and of those, 35,794 (98.3%)  
29 had product summaries that could be converted to machine-readable text. From this sample,  
30 4,936 new devices (13.79%) were identified by the MTI as including software (9.70% of PMA  
31 devices and 13.82% of 510(k) devices. Within the software sample, we found that only 2.13% of  
32 devices had product summaries that included cybersecurity content (3.45% of PMA devices and  
33 2.12% of 510(k) devices included cybersecurity content in their summaries, however, differences  
34 between PMA and 510(k) devices were not statistically significant [ $p=0.62$ ]). Manual review  
35 confirmed that 100% of summaries included the keyword(s) found by our automated program.  
36 Relative to our keyword-based validation exercise, the MTI had a sensitivity of 100% and a  
37 specificity of 94.8%, making it a more conservative measure.

38  
39  
40  
41  
42  
43  
44  
45  
46  
47  
48  
49  
50  
51  
52 **Figure 2** presents the share of devices with software over time, while **Figure 3** presents  
53 the share of devices in the software sample that included cybersecurity content in their product  
54

1  
2  
3 summaries over the same period. The overall share of devices including cybersecurity content  
4  
5 was higher in recent years, growing from an average of 1.4% in the first decade of our sample to  
6  
7 an average of 5.5% in 2015 and 2016, the most recent years included in the sample ( $p = 0.0181$ ).  
8  
9  
10 The share of devices including cybersecurity content also varied across regulatory areas from a  
11  
12 low of 0% across all years in gastroenterology/urology devices, orthopedic devices, and  
13  
14 general/plastic surgery devices, to a high of 22.2% among general hospital devices in 2016  
15  
16 **(Table 1). Supplementary Table 2** provides additional detail of the frequencies of individual  
17  
18 keywords in the sample.  
19  
20  
21  
22  
23

## 24 Discussion

### 25 Summary

26  
27  
28 This study leverages a novel methodology to create an analyzable dataset from public  
29  
30 documents describing newly-marketed medical devices. We found that software is an  
31  
32 increasingly common component of newly approved or cleared devices, while cybersecurity  
33  
34 content in the devices' publicly available product summaries remains rare.  
35  
36

37  
38 As more and more aspects of healthcare are digitized, the cybersecurity of our healthcare  
39  
40 infrastructure—including medical devices—will be increasingly essential to delivering safe and  
41  
42 effective care. Recent events such as the emergence of pacemaker vulnerabilities have  
43  
44 highlighted both the public health implications of information security<sup>29</sup> and importance of  
45  
46 device security.<sup>6</sup> Additionally, the recent security flaws discovered in widely-used computer  
47  
48 processors, highlight the fact that new threats continue to emerge<sup>30</sup> and scholars have highlighted  
49  
50 medicine as a domain where adversarial attacks may be particularly likely to unfold,<sup>31</sup> with the  
51  
52 opportunity for significant clinical impact. Indeed, the NRC has written that “from the standpoint  
53  
54  
55  
56  
57  
58  
59  
60

1  
2  
3 of an individual system or network operator, the only thing worse than being penetrated is being  
4 penetrated and not knowing about it.”<sup>1</sup> This study is an important first step in understanding the  
5 public, transparent reporting of cybersecurity features included in the software embedded in  
6 moderate- and high-risk medical devices. Indeed, our characterization of the growing  
7 importance of software among medium- and high-risk devices should encourage policy-makers  
8 to buttress FDA’s resources accordingly, including support for partnerships with the Department  
9 of Homeland Security and other government, academic, and industry partners focused on  
10 anticipating and responding to emerging threats to patients and public health.  
11  
12  
13  
14  
15  
16  
17  
18  
19  
20  
21  
22  
23

#### 24 *Limitations*

25  
26 The key limitation of this study is that the information we collected is not a mandatory  
27 component of the documents considered. As a result, product summaries may not include all  
28 relevant details of a device’s design with respect to cybersecurity. While this information may  
29 have been present in other places, such as proprietary applications or the full, confidential FDA  
30 dossier, device summaries represent some of the primary documents available for public review,  
31 and therefore play an important role in educating stakeholders, such as clinicians, purchasing  
32 managers, patients, and administrators of health care systems, about the strength of safety and  
33 effectiveness evidence when a new product comes to market. The potential for unobserved  
34 information related to cybersecurity content is the key weakness of this study, however the  
35 study’s key strength is that it is, to our knowledge, the first to take a large-scale approach to  
36 characterizing the availability of cybersecurity content among approved medical devices.  
37  
38  
39  
40  
41  
42  
43  
44  
45  
46  
47  
48  
49  
50  
51  
52  
53

#### 54 *Policy Implications*

1  
2  
3  
4  
5  
6  
7  
8  
9  
10  
11  
12  
13  
14  
15  
16  
17  
18  
19  
20  
21  
22  
23  
24  
25  
26  
27  
28  
29  
30  
31  
32  
33  
34  
35  
36  
37  
38  
39  
40  
41  
42  
43  
44  
45  
46

These findings help define the current landscape of medical device software and cybersecurity features, and suggest an opportunity to better inform healthcare professionals, those engaging in device procurement on behalf of hospitals and health care systems, and patients, on the cybersecurity protections embedded in medical devices. In particular, the current FDA Commissioner, Dr. Scott Gottlieb, has publicly acknowledged the importance of the availability of cyber security information, noting that “Securing medical devices from cybersecurity threats cannot be achieved by just the FDA alone” and that “every stakeholder – manufacturers, hospitals, health care providers, cybersecurity researchers and gov[ernment] entities [has] a unique role to play in addressing these modern challenges.”<sup>32</sup> In the fourth quarter of 2018, in response to the need to “ensure the health care sector is well positioned to proactively respond when cyber vulnerabilities are identified,”<sup>33</sup> the FDA released updated guidance on the content of premarket submissions for the management of cybersecurity in medical devices<sup>10</sup> and the U.S. Department of Health and Human Services similarly recently released voluntary guidance on cybersecurity practices for healthcare organizations<sup>34</sup>. Ongoing opportunities for the exchange of ideas and best practices among regulators, practitioners, and cybersecurity experts, such as those recently hosted by the FDA on the “management of cybersecurity in medical devices”<sup>35</sup> and collaborations between the security research and medical device communities<sup>36</sup> will be valuable for ensuring public health and a better-informed public and medical community will be crucial to ensuring the safety of medical devices moving forward.

47  
48  
49  
50  
51  
52  
53  
54  
55  
56  
57  
58  
59  
60

Our findings also support the case for recent proposals by US regulators to include a cybersecurity “bill of materials” in the submission of new medical devices. The proposal calls for “principles and approaches [that] are broadly applicable to all medical devices and are intended to be consistent with the National Institute of Standards and Technology (NIST)

1  
2  
3 Framework for Improving Critical Infrastructure Cybersecurity.”<sup>10</sup> Such a standardized approach  
4  
5 would represent an important step in addressing the cybersecurity information deficit that we  
6  
7 have documented here. Further, many individual hospitals and other purchasers of medical  
8  
9 devices currently perform independent information security assessments of medical devices - a  
10  
11 slow, resource intensive, and costly process. Standardizing the information security review  
12  
13 process and making the results available publicly would bring substantial efficiencies for medical  
14  
15 device vendors and healthcare organizations.  
16  
17  
18  
19  
20

### 21 *Looking Ahead*

22  
23  
24 In an increasingly digitized health care ecosystem, manufacturers will face increasing  
25  
26 demands for product safety in the form of cybersecurity protections. Moreover, stakeholders  
27  
28 will increasingly seek out information about the safety features of new products. Regulators and  
29  
30 manufacturers should collaborate to make the software and cybersecurity content of new  
31  
32 products more easily accessible, and should continue to work together to determine which  
33  
34 cybersecurity content should be disclosed and required for regulatory clearance and approval of  
35  
36 new products moving forward. It will also be important for future researchers to closely track the  
37  
38 availability of cybersecurity content in newly-approved medical devices and to explore whether  
39  
40 the publication of such content impacts the product utilization decisions of patients and health  
41  
42 care providers.  
43  
44  
45  
46  
47

### 48 **Figure Legend**

49  
50 Figure 1: Assembly of analysis sample and results

51  
52 Figure 2: Share of new devices with software (“software sample”)

53  
54 Figure 3: Share of software sample with cybersecurity content  
55  
56  
57  
58  
59  
60

1  
2  
3 **Author Contributions:** ADS designed the study in consultation with WJG, ABL, and DBK.

4  
5 ADS collected the data from public sources and performed the primary analysis. All authors had  
6  
7 full access to the data and analysis programs for this study and take responsibility for the  
8  
9 integrity of the data and the accuracy of the analysis. All authors wrote the manuscript.  
10  
11  
12

13  
14 **License:** The Corresponding Author has the right to grant on behalf of all authors and does grant  
15  
16 on behalf of all authors, an exclusive licence (or non exclusive for government employees) on a  
17  
18 worldwide basis to the BMJ Publishing Group Ltd ("BMJ"), and its Licensees to permit this  
19  
20 article (if accepted) to be published in *The BMJ's* editions and any other BMJ products and to  
21  
22 exploit all subsidiary rights, as set out in our licence.  
23  
24  
25

26  
27  
28 **Data Sharing Statement:** Statistical code and the full dataset are available at  
29  
30 <https://github.com/arieldora/SternCybersecurityContent>  
31  
32  
33

34  
35  
36 **Conflicts of Interest:** Dr. Landman is a member of the Abbott Medical Device Cybersecurity  
37  
38 Council. Dr. Kramer is supported by the Greenwall Faculty Scholars Program in Bioethics, is a  
39  
40 consultant to Circulatory Systems Advisory Panel of the Food and Drug Administration, and has  
41  
42 provided consulting to the Baim Institute for Clinical Research for clinical trials of medical  
43  
44 devices (unrelated to the study topic). There are no other financial or commercial financial  
45  
46 conflicts of interest related to the study topic to report.  
47  
48  
49

50  
51  
52 **Funding:** The Harvard Business School Division of Research and Faculty Development  
53  
54 supported the data collection for this study. Dr. Stern is supported by the Kauffman Junior  
55  
56  
57

1  
2  
3  
4  
5  
6  
7  
8  
9  
10  
11  
12  
13  
14  
15  
16  
17  
18  
19  
20  
21  
22  
23  
24  
25  
26  
27  
28  
29  
30  
31  
32  
33  
34  
35  
36  
37  
38  
39  
40  
41  
42  
43  
44  
45  
46  
47  
48  
49  
50  
51  
52  
53  
54  
55  
56  
57  
58  
59  
60

Faculty Fellowship and Dr. Kramer is supported by the Greenwall Faculty Scholars Program in Bioethics.

For peer review only



## References

1. National Research Council. At the Nexus of Cybersecurity and Public Policy: Some Basic Concepts and Issues [Internet]. The National Academies Press; 2014. Available from: <https://doi.org/10.17226/18749> [accessed 10 Jul 2018].
2. Burr R. S.754 - 114th Congress (2015-2016): To improve cybersecurity in the United States through enhanced sharing of information about cybersecurity threats, and for other purposes. [Internet]. 2015. Available from: <https://www.congress.gov/bill/114th-congress/senate-bill/754> [accessed 10 Jul 2018].
3. Blau M. Hospitals brace for security risks that could come with using wearables for patient care [Internet]. STAT. 2017. Available from: <https://www.statnews.com/2017/08/04/hospitals-security-risks-wearables/> [accessed 10 Jul 2018].
4. Kuchler H. Medical device makers wake up to cyber security threat. Financial Times [Internet]. 2017 Aug 1; Available from: <https://www.ft.com/content/00989b9c-7634-11e7-90c0-90a9d1bc9691> [accessed 10 Jul 2018].
5. Kramer DB, Fu K. Cybersecurity Concerns and Medical Devices: Lessons From a Pacemaker Advisory. JAMA. 2017 Dec 5;318(21):2077–8.
6. Fox-Brewster T. Medical Devices Hit By Ransomware For The First Time In US Hospitals [Internet]. Forbes. 2017. Available from: <https://www.forbes.com/sites/thomasbrewster/2017/05/17/wannacry-ransomware-hit-real-medical-devices/#4a76dbe8425c> [accessed 10 Jul 2018].
7. IoT guardian for the healthcare industry [Internet]. ZingBox; 2016. Available from: [http://www.zingbox.com/wp-content/uploads/2017/02/ZingBox\\_WP\\_IoT-Guardian-for-the-Healthcare-Industry.pdf](http://www.zingbox.com/wp-content/uploads/2017/02/ZingBox_WP_IoT-Guardian-for-the-Healthcare-Industry.pdf) [accessed 10 Jul 2018].
8. Hughes O. WannaCry impact on NHS considerably larger than previously suggested [Internet]. Digital Health. 2017. Available from: <https://www.digitalhealth.net/2017/10/wannacry-impact-on-nhs-considerably-larger-than-previously-suggested/> [accessed 10 Jul 2018].
9. Department of Health. Investigation: WannaCry cyber attack and the NHS [Internet]. 2017 October. Report No.: HC 414. Available from: <https://www.nao.org.uk/wp-content/uploads/2017/10/Investigation-WannaCry-cyber-attack-and-the-NHS.pdf> [accessed 10 Jul 2018].
10. Food and Drug Administration. Content of Premarket Submissions for Management of Cybersecurity in Medical Devices - Guidance for Industry and Food and Drug Administration Staff. Available from: <https://www.fda.gov/downloads/medicaldevices/deviceregulationandguidance/guidancedocuments/ucm356190.pdf> [accessed 10 Jul 2018].
11. Postmarket Management of Cybersecurity in Medical Devices - Guidance for Industry and Food and Drug Administration Staff. Available from:

1  
2  
3 <https://www.fda.gov/downloads/medicaldevices/deviceregulationandguidance/guidancedocuments/ucm482022.pdf> [accessed 10 Jul 2018].

6 12. 510(k) Premarket Notification. 2017; Available from:  
7 <https://www.accessdata.fda.gov/scripts/cdrh/cfdocs/cfPMN/pmn.cfm> [accessed 10 Jul 2018].

9 13. Premarket Approval (PMA). 2018; Available from:  
10 <https://www.accessdata.fda.gov/scripts/cdrh/cfdocs/cfPMA/pma.cfm> [accessed 10 Jul 2018].

12 14. Zheng SY, Dhruva SS, Redberg RF. Characteristics of Clinical Studies Used for US Food and Drug  
13 Administration Approval of High-Risk Medical Device Supplements. *JAMA*. 2017 Aug 15;318(7):619–25.

15 15. Dhruva SS, Bero LA, Redberg RF. Strength of study evidence examined by the FDA in premarket  
16 approval of cardiovascular devices. *JAMA*. 2009 Dec 23;302(24):2679–85.

18 16. Content of a 510(k). 2017 Oct 31; Available from:  
19 [https://www.fda.gov/MedicalDevices/DeviceRegulationandGuidance/HowtoMarketYourDevice/PremarketSubmissions/PremarketNotification510k/ucm142651.htm#link\\_7](https://www.fda.gov/MedicalDevices/DeviceRegulationandGuidance/HowtoMarketYourDevice/PremarketSubmissions/PremarketNotification510k/ucm142651.htm#link_7) [accessed 10 Jul 2018].

22 17. PMA Application Contents. 2018 Feb 2; Available from:  
23 <https://www.fda.gov/MedicalDevices/DeviceRegulationandGuidance/HowtoMarketYourDevice/PremarketSubmissions/PremarketApprovalPMA/ucm050289.htm#ssed> [accessed 10 Jul 2018].

25 18. Kramer DB, Kesselheim AS. User Fees and Beyond — The FDA Safety and Innovation Act of 2012.  
26 *N Engl J Med*. 2012 Oct 4;367(14):1277–9.

28 19. Kramer DB, Xu S, Kesselheim AS. Regulation of Medical Devices in the United States and  
29 European Union. *N Engl J Med*. 2012 Mar 1;366(9):848–55.

31 20. Rome BN, Kramer DB, Kesselheim AS. FDA approval of cardiac implantable electronic devices via  
32 original and supplement premarket approval pathways, 1979-2012. *JAMA*. 2014 Jan 22;311(4):385–91.

34 21. NLM Medical Text Indexer (MTI). 2018; Available from: <https://ii.nlm.nih.gov/MTI> [accessed 10  
35 Jul 2018].

37 22. MeSH [Internet]. [cited 2018 Feb 5]. Available from: <https://www.ncbi.nlm.nih.gov/mesh>  
38 [accessed 10 Jul 2018].

40 23. Summary of Safety and Effectiveness Data (SSED) [Internet]. Available from:  
41 [https://www.accessdata.fda.gov/cdrh\\_docs/pdf10/P100034b.pdf](https://www.accessdata.fda.gov/cdrh_docs/pdf10/P100034b.pdf) [accessed 10 Jul 2018].

43 24. Kissel R. Glossary of Key Information Security Terms [Internet]. 2013 p. 1–218. Available from:  
44 <http://nvlpubs.nist.gov/nistpubs/ir/2013/NIST.IR.7298r2.pdf> [accessed 10 Jul 2018].

46 25. Manufacturer Disclosure Statement for Medical Device Security (MDS2). 2017; Available from:  
47 <http://www.himss.org/resourcelibrary/MDS2> [accessed 10 Jul 2018].

49 26. How medical devices like pacemakers and insulin pumps can be hacked [Internet]. CBS News.  
50 Available from: <https://www.cbsnews.com/news/cybersecurity-researchers-show-medical-devices-hacking-vulnerabilities/>  
51 [accessed 29 Jan 2019].

- 1  
2  
3 27. Gellman L. Insecure Medical Devices Vulnerable to Malicious Hacking [Internet]. Available from:  
4 [http://nymag.com/intelligencer/2018/08/insecure-medical-devices-vulnerable-to-malicious-](http://nymag.com/intelligencer/2018/08/insecure-medical-devices-vulnerable-to-malicious-hacking.html)  
5 [hacking.html](http://nymag.com/intelligencer/2018/08/insecure-medical-devices-vulnerable-to-malicious-hacking.html) [accessed 29 Jan 2019].  
6
- 7 28. Innes S. “Ethical hackers” are working to warn physicians about cyberattacks [Internet]. 2018.  
8 Available from: [https://www.azcentral.com/story/news/local/arizona-health/2018/12/27/ethical-](https://www.azcentral.com/story/news/local/arizona-health/2018/12/27/ethical-hackers-warn-physicians-cyberattacks-christian-dameff-arizona-college-medicine-jeff-tully/2277625002/)  
9 [hackers-warn-physicians-cyberattacks-christian-dameff-arizona-college-medicine-jeff-tully/2277625002/](https://www.azcentral.com/story/news/local/arizona-health/2018/12/27/ethical-hackers-warn-physicians-cyberattacks-christian-dameff-arizona-college-medicine-jeff-tully/2277625002/)  
10 [accessed 29 Jan 2019].  
11
- 12 29. Gordon WJ, Fairhall A, Landman A. Threats to Information Security — Public Health Implications.  
13 *N Engl J Med*. 2017 Aug 24;377(8):707–9.  
14
- 15 30. Finlayson SG, Won Chung H, Kohane IS, Beam AL. Adversarial Attacks Against Medical Deep  
16 Learning Systems. *arXiv* [Internet]. 2018 May 21 [cited 2019 Jan 31]; Available from:  
17 <https://arxiv.org/abs/1804.05296> [accessed 29 Jan 2019].  
18
- 19 31. Metz C, Perloth N. Researchers Discover Two Major Flaws in the World’s Computers. *The New*  
20 *York Times* [Internet]. 2018 Jan 3; Available from:  
21 <https://www.nytimes.com/2018/01/03/business/computer-flaws.html> [accessed 10 Jul 2019].  
22
- 23 32. Scott Gottlieb, M.D. on Twitter: “4/4 Securing medical devices from cybersecurity threats cannot  
24 be achieved by just the #FDA alone. Every stakeholder—manufacturers, hospitals, health care providers,  
25 cybersecurity researchers and govt entities – all have a unique role to play in addressing these modern  
26 challenges” [Internet]. 2018. Available from:  
27 <https://twitter.com/SGottliebFDA/status/1046847875840450560> [accessed 29 Jan 2019].  
28
- 29 33. FDA In Brief: FDA proposes updated cybersecurity recommendations to help ensure device  
30 manufacturers are adequately addressing evolving cybersecurity threats [Internet]. 2018. Available  
31 from: <https://www.fda.gov/NewsEvents/Newsroom/FDAInBrief/ucm623624.htm> [accessed 29 Jan  
32 2019].  
33
- 34 34. Health Industry Cybersecurity Practices: Managing Threats and Protecting Patients. 36. Available  
35 from: <https://www.phe.gov/Preparedness/planning/405d/Documents/HICP-Main-508.pdf> [accessed 29  
36 Jan 2019].  
37
- 38 35. Workshops & Conferences (Medical Devices) > Public Workshop - Content of Premarket  
39 Submissions for Management of Cybersecurity in Medical Devices January 29-30, 2019 [Internet].  
40 Available from:  
41 <https://www.fda.gov/MedicalDevices/NewsEvents/WorkshopsConferences/ucm623171.htm> [accessed  
42 29 Jan 2019].  
43
- 44 36. #WeHeartHackers | A collaborative movement between the medical device and security  
45 researcher communities. [Internet]. [cited 2019 Jan 31]. Available from: <http://wehearthackers.org/>  
46 [accessed 29 Jan 2019].  
47
- 48  
49  
50  
51  
52  
53  
54  
55  
56  
57  
58  
59  
60

1  
2  
3  
4  
5  
6  
7  
8  
9  
10  
11  
12  
13  
14  
15  
16  
17  
18  
19  
20  
21  
22  
23  
24  
25  
26  
27  
28  
29  
30  
31  
32  
33  
34  
35  
36  
37  
38  
39  
40  
41  
42  
43  
44  
45  
46  
47

**Table 1: Number of devices with machine-readable summaries by FDA/CDRH Advisory Committee and year, share with software and share of software sample with cybersecurity content by Advisory Committee**

|                                                     | FDA/CDRH Advisory Committee |                     |             |                                |                       |                 |                |                               |        |
|-----------------------------------------------------|-----------------------------|---------------------|-------------|--------------------------------|-----------------------|-----------------|----------------|-------------------------------|--------|
|                                                     | Clinical Chemistry (CH)     | Cardiovascular (CV) | Dental (DE) | Gastroenterology, Urology (GU) | General Hospital (HO) | Orthopedic (OR) | Radiology (RA) | General, Plastic Surgery (SU) | Totals |
| Year                                                |                             |                     |             |                                |                       |                 |                |                               |        |
| 2002                                                | 216                         | 436                 | 318         | 215                            | 328                   | 403             | 290            | 367                           | 2573   |
| 2003                                                | 192                         | 441                 | 295         | 233                            | 329                   | 389             | 329            | 357                           | 2565   |
| 2004                                                | 204                         | 395                 | 284         | 195                            | 270                   | 464             | 345            | 319                           | 2476   |
| 2005                                                | 155                         | 389                 | 245         | 166                            | 262                   | 480             | 310            | 331                           | 2338   |
| 2006                                                | 197                         | 412                 | 293         | 142                            | 244                   | 442             | 338            | 362                           | 2430   |
| 2007                                                | 153                         | 358                 | 283         | 160                            | 257                   | 444             | 271            | 319                           | 2245   |
| 2008                                                | 149                         | 387                 | 279         | 139                            | 207                   | 477             | 325            | 370                           | 2333   |
| 2009                                                | 130                         | 442                 | 268         | 155                            | 254                   | 432             | 290            | 316                           | 2287   |
| 2010                                                | 121                         | 390                 | 245         | 157                            | 280                   | 428             | 235            | 312                           | 2168   |
| 2011                                                | 163                         | 428                 | 258         | 141                            | 241                   | 542             | 347            | 285                           | 2405   |
| 2012                                                | 155                         | 426                 | 240         | 166                            | 282                   | 551             | 344            | 302                           | 2466   |
| 2013                                                | 185                         | 428                 | 235         | 153                            | 202                   | 554             | 346            | 301                           | 2404   |
| 2014                                                | 130                         | 400                 | 225         | 199                            | 245                   | 583             | 385            | 342                           | 2509   |
| 2015                                                | 108                         | 392                 | 244         | 179                            | 174                   | 575             | 340            | 322                           | 2334   |
| 2016                                                | 95                          | 368                 | 230         | 171                            | 204                   | 464             | 375            | 354                           | 2261   |
| <b>Totals</b>                                       | 2353                        | 6092                | 3942        | 2571                           | 3779                  | 7228            | 4870           | 4959                          | 35794  |
| Share with software ("software sample")             | 9.14%                       | 18.99%              | 4.59%       | 8.01%                          | 4.97%                 | 1.36%           | 52.28%         | 6.96%                         | 13.79% |
| Share of software sample with cybersecurity content | 7.91%                       | 2.51%               | 1.66%       | 0.00%                          | 2.13%                 | 0.00%           | 2.04%          | 0.00%                         | 2.13%  |

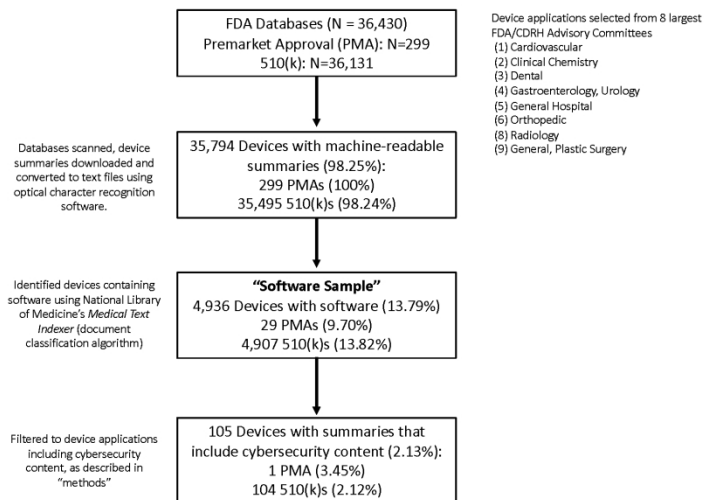

Figure 1: Assembly of analysis sample and results

1  
2  
3  
4  
5  
6  
7  
8  
9  
10  
11  
12  
13  
14  
15  
16  
17  
18  
19  
20  
21  
22  
23  
24  
25  
26  
27  
28  
29  
30  
31  
32  
33  
34  
35  
36  
37  
38  
39  
40  
41  
42  
43  
44  
45  
46  
47  
48  
49  
50  
51  
52  
53  
54  
55  
56  
57  
58  
59  
60

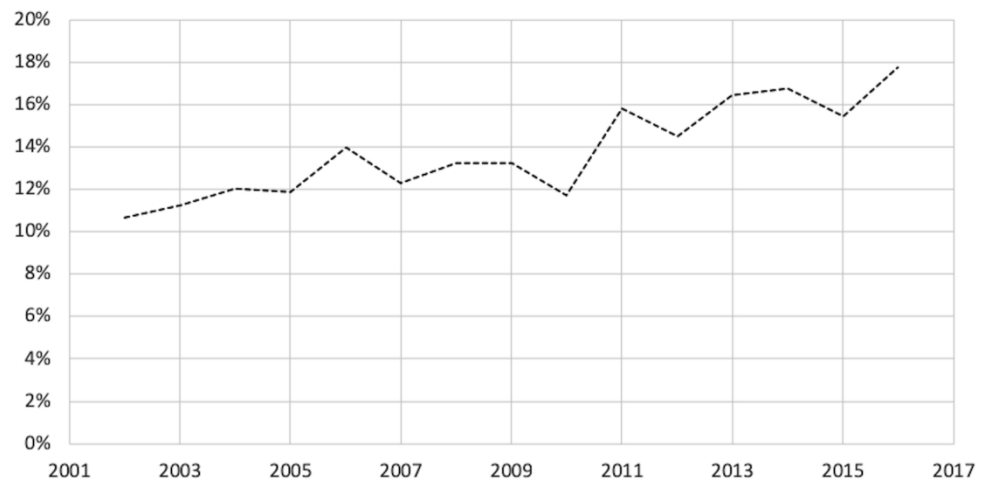

Figure 2: Share of new devices with software ("software sample")

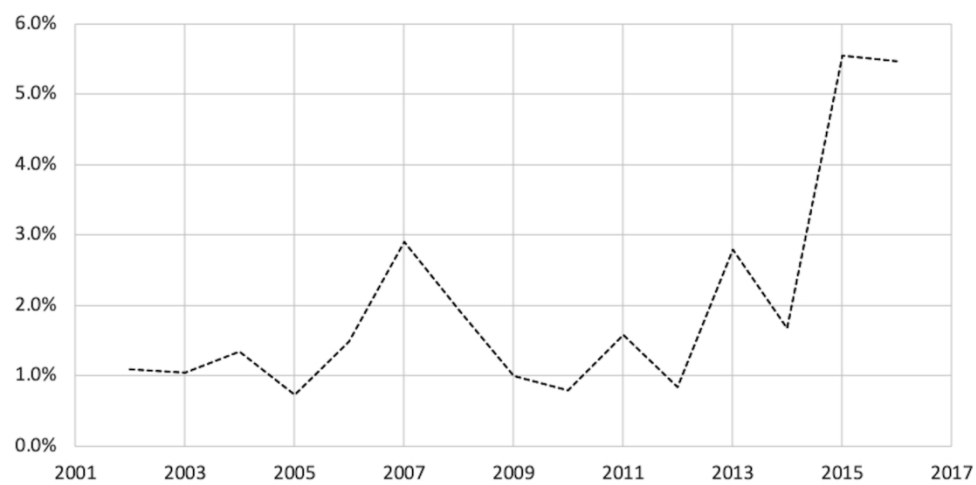

Figure 3: Share of software sample with cybersecurity content

## Supplementary Material

### I. Processing Using the Medical Text Indexer (MTI)

We sent each of our optical character recognition-processed text files to the MTI and recorded which summaries were classified as being related to software in the MeSH® Tree (ontology). We flagged all products whose summaries were assigned to the “software” MeSH® term, number L01.224.900.

### II. Sensitivity Analysis

In sensitivity analyses we considered an alternate method of identifying devices containing software. For this exercise, we electronically scanned each product summary for the keyword “software” and recorded whether the word “software” appeared anywhere within a device’s product summary (i.e. at least once in the document).

We expected that the MTI-driven method of identifying the “software sample” would have a high sensitivity but a lower specificity relative to the keyword-based method for the following reason: in order for a text document to be flagged by the MTI’s algorithm as being related to the subject of “software” the text document would need describe relevant software content in some detail – i.e. often beyond simply utilizing the keyword “software” at least once.

Indeed, the keyword-based method of identifying software products captured 100% of the products that were identified as including software using the MTI results, but also identified additional products that employ the word “software” in their product summaries at least once (**Supplementary Table**).

Relative to the keyword method, we conclude that the MTI-based method of identifying software products had a 100% sensitivity, but only a 94.8% specificity in our sample. Given the high sensitivity of this method, the MTI-based software sample is the more conservative method for identifying devices with software. However, alternative results using the keyword-based definition are highly similar to those obtained using the MTI-based definition. The total share of the software device sample that includes cybersecurity content is statistically indistinguishable in every year of the sample and visibly similar over time (**Supplementary Table and Supplementary Figure**)



Supplementary Table 1: Comparison of MTI and Keyword-based Methods of Identifying Software over Time

| Year   | Total Devices | Software sample (MTI defined) | Software sample (keyword defined) | Total devices with cybersecurity content (MTI) | % with cybersecurity content (MTI sample) | Total devices with cybersecurity content (keyword sample) | % with cybersecurity content (keyword) |
|--------|---------------|-------------------------------|-----------------------------------|------------------------------------------------|-------------------------------------------|-----------------------------------------------------------|----------------------------------------|
| 2002   | 2573          | 275                           | 318                               | 3                                              | 1.09%                                     | 3                                                         | 0.94%                                  |
| 2003   | 2565          | 289                           | 347                               | 3                                              | 1.04%                                     | 4                                                         | 1.15%                                  |
| 2004   | 2476          | 298                           | 350                               | 4                                              | 1.34%                                     | 4                                                         | 1.14%                                  |
| 2005   | 2338          | 277                           | 323                               | 2                                              | 0.72%                                     | 3                                                         | 0.93%                                  |
| 2006   | 2430          | 339                           | 397                               | 5                                              | 1.47%                                     | 5                                                         | 1.26%                                  |
| 2007   | 2245          | 276                           | 314                               | 8                                              | 2.90%                                     | 8                                                         | 2.55%                                  |
| 2008   | 2333          | 309                           | 371                               | 6                                              | 1.94%                                     | 8                                                         | 2.16%                                  |
| 2009   | 2287          | 303                           | 373                               | 3                                              | 0.99%                                     | 3                                                         | 0.80%                                  |
| 2010   | 2168          | 254                           | 356                               | 2                                              | 0.79%                                     | 5                                                         | 1.40%                                  |
| 2011   | 2405          | 380                           | 524                               | 6                                              | 1.58%                                     | 7                                                         | 1.34%                                  |
| 2012   | 2466          | 357                           | 526                               | 3                                              | 0.84%                                     | 6                                                         | 1.14%                                  |
| 2013   | 2404          | 395                           | 597                               | 11                                             | 2.78%                                     | 15                                                        | 2.51%                                  |
| 2014   | 2509          | 421                           | 635                               | 7                                              | 1.66%                                     | 17                                                        | 2.68%                                  |
| 2015   | 2334          | 361                           | 636                               | 20                                             | 5.54%                                     | 33                                                        | 5.19%                                  |
| 2016   | 2261          | 402                           | 721                               | 22                                             | 5.47%                                     | 43                                                        | 5.96%                                  |
| Totals | 35794         | 4936                          | 6788                              | 105                                            | 2.13%                                     | 164                                                       | 2.42%                                  |

1  
2  
3  
4  
5  
6  
7  
8  
9  
10  
11  
12  
13  
14  
15  
16  
17  
18  
19  
20  
21  
22  
23  
24  
25  
26  
27  
28  
29  
30  
31  
32  
33  
34  
35  
36  
37  
38  
39  
40  
41  
42  
43  
44  
45  
46  
47

**Supplementary Table 2: List of keywords related to cybersecurity content:**

| Source | Term                          | Allowable alternative(s)                          | Counts |
|--------|-------------------------------|---------------------------------------------------|--------|
| NICCS  | access control                |                                                   | 17     |
| NICCS  | active attack                 |                                                   | 0      |
| NICCS  | air gap                       |                                                   | 5      |
| NICCS  | antispymware software         | anti-spyware software, anti-spyware, antispymware | 1      |
| NICCS  | antivirus software            | anti-virus software, anti-virus, antivirus        | 3      |
| NICCS  | asymmetric cryptography       |                                                   | 0      |
| NICCS  | cipher                        |                                                   | 0      |
| NICCS  | computer network defense      |                                                   | 0      |
| NICCS  | computer security incident    |                                                   | 0      |
| NICCS  | cryptanalysis                 |                                                   | 0      |
| NICCS  | cryptographic algorithm       |                                                   | 0      |
| NICCS  | cryptography                  |                                                   | 1      |
| NICCS  | cyber ecosystem               |                                                   | 0      |
| NICCS  | cyber exercise                |                                                   | 0      |
| NICCS  | cyber incident                | cyber-incident                                    | 0      |
| NICCS  | cyber infrastructure          | cyber-infrastructure                              | 0      |
| NICCS  | cybersecurity                 | cyber-security                                    | 58     |
| NICCS  | data breach                   |                                                   | 0      |
| NICCS  | data leakage                  |                                                   | 0      |
| NICCS  | data theft                    | data-theft                                        | 0      |
| NICCS  | decrypt                       |                                                   | 3      |
| NICCS  | denial of service             | denial-of-service                                 | 0      |
| NICCS  | designed-in security          | designed in security                              | 0      |
| NICCS  | digital forensics             |                                                   | 0      |
| NICCS  | distributed denial of service | distributed denial-of-service, DDOS, D.D.O.S.     | 0      |
| NICCS  | dynamic attack surface        |                                                   | 0      |

|    |              |                                                                    |                                                              |     |
|----|--------------|--------------------------------------------------------------------|--------------------------------------------------------------|-----|
| 1  |              |                                                                    |                                                              |     |
| 2  |              |                                                                    |                                                              |     |
| 3  |              |                                                                    |                                                              |     |
| 4  | NICCS        | encrypt                                                            |                                                              | 44  |
| 5  | NICCS        | enterprise risk management                                         |                                                              | 0   |
| 6  | NICCS        | exploitation analysis                                              |                                                              | 0   |
| 7  | NICCS        | identity and access management                                     |                                                              | 0   |
| 8  | NICCS        | information security policy                                        |                                                              | 0   |
| 9  | NICCS        | information system resilience                                      | Information Systems Security                                 | 0   |
| 10 | NICCS        | Information Systems Security Operations                            |                                                              | 0   |
| 11 | NICCS        | intrusion detection                                                |                                                              | 0   |
| 12 | NICCS        | malicious code                                                     |                                                              | 0   |
| 13 | NICCS        | malware                                                            |                                                              | 0   |
| 14 | NICCS        | NICCS                                                              | National Initiative for Cybersecurity Careers and Study      | 0   |
| 15 | NICCS        | penetration testing                                                |                                                              | 83  |
| 16 | NICCS        | phishing                                                           |                                                              | 0   |
| 17 | NICCS        | security incident                                                  |                                                              | 0   |
| 18 | NICCS        | security policy                                                    |                                                              | 0   |
| 19 | NICCS        | spyware                                                            | spy-ware                                                     | 0   |
| 20 | NICCS        | symmetric cryptography                                             |                                                              | 0   |
| 21 | NICCS        | symmetric encryption algorithm                                     |                                                              | 0   |
| 22 | NICCS        | symmetric key                                                      |                                                              | 0   |
| 23 | NICCS        | systems security architecture                                      |                                                              | 0   |
| 24 | NICCS        | threat assessment                                                  |                                                              | 0   |
| 25 | NICCS        | cybersecurity routine updates and patches                          | cybersecurity routine updates, cybersecurity routine patches | 0   |
| 26 | FDA Guidance | cybersecurity signal                                               |                                                              | 0   |
| 27 | FDA Guidance | exploit                                                            |                                                              | 2   |
| 28 | FDA Guidance | Information Sharing Analysis Organizations                         | ISAO, ISAOs                                                  | 2   |
| 29 | FDA Guidance | NIST                                                               | National Institute of Standards and Technology               | 150 |
| 30 | FDA Guidance | NIST Framework for Improving Critical Infrastructure Cybersecurity |                                                              | 0   |
| 31 | FDA Guidance | NIST Framework                                                     |                                                              | 0   |
| 32 |              |                                                                    |                                                              |     |
| 33 |              |                                                                    |                                                              |     |
| 34 |              |                                                                    |                                                              |     |
| 35 |              |                                                                    |                                                              |     |
| 36 |              |                                                                    |                                                              |     |
| 37 |              |                                                                    |                                                              |     |
| 38 |              |                                                                    |                                                              |     |
| 39 |              |                                                                    |                                                              |     |
| 40 |              |                                                                    |                                                              |     |
| 41 |              |                                                                    |                                                              |     |
| 42 |              |                                                                    |                                                              |     |
| 43 |              |                                                                    |                                                              |     |
| 44 |              |                                                                    |                                                              |     |
| 45 |              |                                                                    |                                                              |     |
| 46 |              |                                                                    |                                                              |     |
| 47 |              |                                                                    |                                                              |     |

Supplementary Figure 1: FDA medical device approval pathways

| Regulatory Pathways for Medical Devices in the United States                                                                                                                                                                                                                                                                                                                                                                                                                                                                                                                                                                                                                                                                                                                                                                                                                                                                                                                                                                                                                                                                                                                                 |                                                                                                                                                                            |                                                                                          |
|----------------------------------------------------------------------------------------------------------------------------------------------------------------------------------------------------------------------------------------------------------------------------------------------------------------------------------------------------------------------------------------------------------------------------------------------------------------------------------------------------------------------------------------------------------------------------------------------------------------------------------------------------------------------------------------------------------------------------------------------------------------------------------------------------------------------------------------------------------------------------------------------------------------------------------------------------------------------------------------------------------------------------------------------------------------------------------------------------------------------------------------------------------------------------------------------|----------------------------------------------------------------------------------------------------------------------------------------------------------------------------|------------------------------------------------------------------------------------------|
| Pathway                                                                                                                                                                                                                                                                                                                                                                                                                                                                                                                                                                                                                                                                                                                                                                                                                                                                                                                                                                                                                                                                                                                                                                                      | 510(k)<br>(Premarket Notification)                                                                                                                                         | PMA<br>(Premarket Approval)                                                              |
| Products                                                                                                                                                                                                                                                                                                                                                                                                                                                                                                                                                                                                                                                                                                                                                                                                                                                                                                                                                                                                                                                                                                                                                                                     | Typically moderate-risk ("class II") devices                                                                                                                               | Typically high-risk ("class III") devices                                                |
| Requirements                                                                                                                                                                                                                                                                                                                                                                                                                                                                                                                                                                                                                                                                                                                                                                                                                                                                                                                                                                                                                                                                                                                                                                                 | Typically do not necessitate full clinical trials, but require evidence of "substantial equivalence" to a predicate device, which has been shown to be safe and effective. | Typically require clinical trials to demonstrate a new device's safety and effectiveness |
| Product development time to market                                                                                                                                                                                                                                                                                                                                                                                                                                                                                                                                                                                                                                                                                                                                                                                                                                                                                                                                                                                                                                                                                                                                                           | 31 months                                                                                                                                                                  | 54 months                                                                                |
| Sources:<br>Maisel WH. Medical device regulation: an introduction for the practicing physician. <i>Annals of internal medicine</i> . 2004 Feb 17;140(4):296-302.<br><a href="https://www.fda.gov/MedicalDevices/DeviceRegulationandGuidance/HowtoMarketYourDevice/PremarketSubmissions/PremarketNotification510k">https://www.fda.gov/MedicalDevices/DeviceRegulationandGuidance/HowtoMarketYourDevice/PremarketSubmissions/PremarketNotification510k</a><br><a href="https://www.fda.gov/medicaldevices/deviceregulationandguidance/howtomarketyourdevice/premarketsubmissions/premarketapprovalpma">https://www.fda.gov/medicaldevices/deviceregulationandguidance/howtomarketyourdevice/premarketsubmissions/premarketapprovalpma</a><br><br>Makower J, Meer A, Denend L. FDA impact on US medical technology innovation: a survey of over 200 medical technology companies. <i>Advanced Medical Technology Association</i> , Washington, DC, available at: <a href="http://www.advamed.org/NR/rdonlyres/040E6C33-380B-4F6B-AB58-9AB1C0A7A3CF/0/makowerreportfinal.pdf">http://www.advamed.org/NR/rdonlyres/040E6C33-380B-4F6B-AB58-9AB1C0A7A3CF/0/makowerreportfinal.pdf</a> . 2010 Nov. |                                                                                                                                                                            |                                                                                          |

Supplementary Figure 2: comparison of main results using alternative method of identifying the software sample

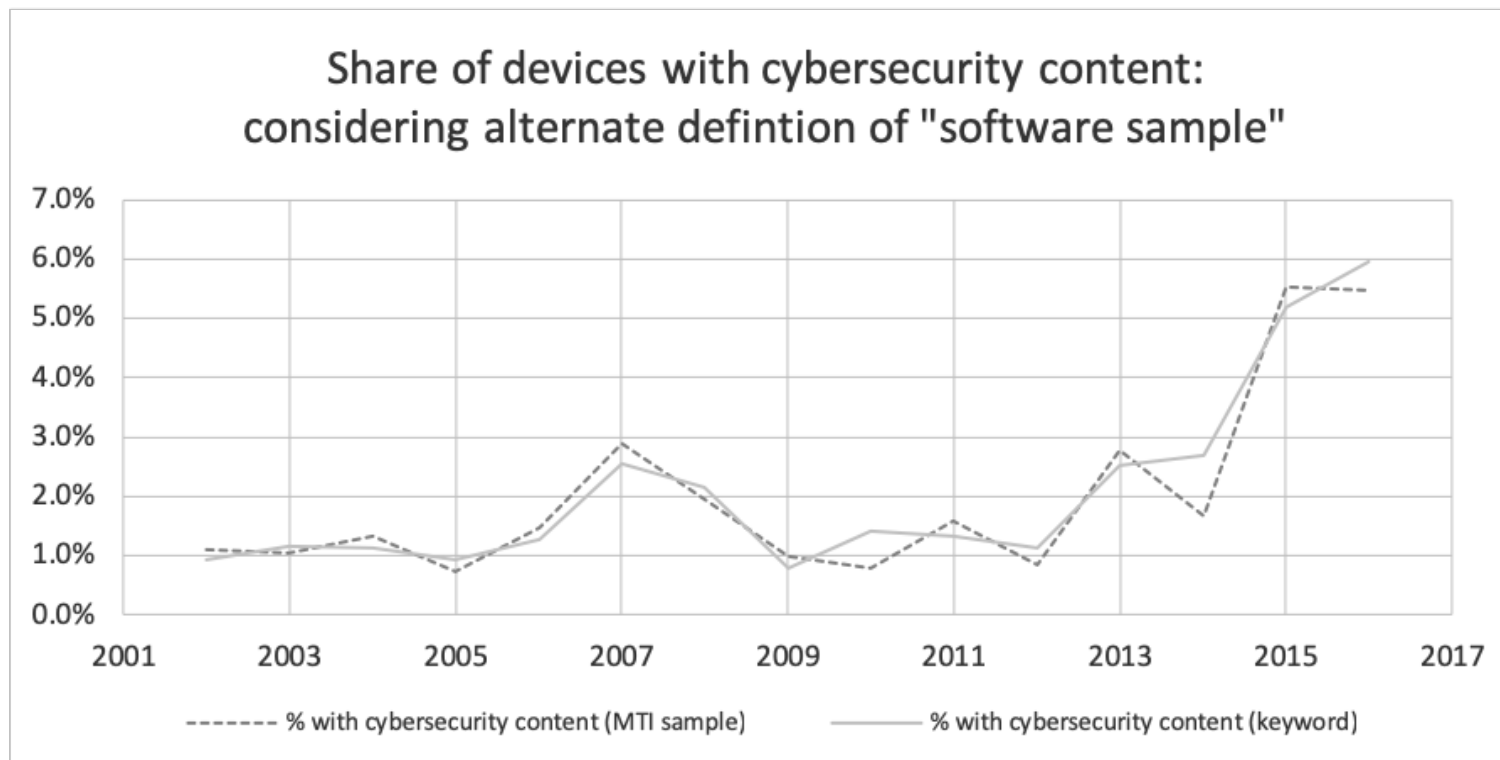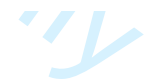

# BMJ Open

## Cybersecurity Features of Digital Medical Devices: An Analysis of FDA Product Summaries

|                                 |                                                                                                                                                                                                                                                                                                                                                                                                                                                       |
|---------------------------------|-------------------------------------------------------------------------------------------------------------------------------------------------------------------------------------------------------------------------------------------------------------------------------------------------------------------------------------------------------------------------------------------------------------------------------------------------------|
| Journal:                        | <i>BMJ Open</i>                                                                                                                                                                                                                                                                                                                                                                                                                                       |
| Manuscript ID                   | bmjopen-2018-025374.R2                                                                                                                                                                                                                                                                                                                                                                                                                                |
| Article Type:                   | Research                                                                                                                                                                                                                                                                                                                                                                                                                                              |
| Date Submitted by the Author:   | 16-May-2019                                                                                                                                                                                                                                                                                                                                                                                                                                           |
| Complete List of Authors:       | Stern, Ariel; Harvard Business School Technology and Operations Management; Harvard-MIT Center for Regulatory Science<br>Gordon, William; Brigham and Women's Hospital Department of Medicine; Harvard Medical School<br>Landman, Adam; Brigham and Women's Hospital Department of Medicine<br>Kramer, Daniel; Beth Israel Deaconess Medical Center, Richard A. and Susan F. Smith Center for Outcomes Research in Cardiology; Harvard Medical School |
| <b>Primary Subject Heading</b>: | Health informatics                                                                                                                                                                                                                                                                                                                                                                                                                                    |
| Secondary Subject Heading:      | Health policy, Pharmacology and therapeutics                                                                                                                                                                                                                                                                                                                                                                                                          |
| Keywords:                       | Medical Devices, Software, Cybersecurity, FDA, Regulatory Policy                                                                                                                                                                                                                                                                                                                                                                                      |
|                                 |                                                                                                                                                                                                                                                                                                                                                                                                                                                       |

SCHOLARONE™  
Manuscripts

1  
2  
3 **CYBERSECURITY FEATURES OF DIGITAL MEDICAL DEVICES:**  
4  
5 **AN ANALYSIS OF FDA PRODUCT SUMMARIES**  
6  
7  
8

9 Ariel D Stern, Assistant Professor Harvard Business School and the Harvard-MIT Center for  
10 Regulatory Science, Morgan Hall 433, Soldiers Field Rd, Boston, MA 02163, astern@hbs.edu  
11

12  
13 William J Gordon, Instructor of Medicine, Division of General Internal Medicine, Brigham and  
14 Women's Hospital, Harvard Medical School, 1620 Tremont Street, Boston, MA 02120,  
15 wgordon@partners.org  
16

17 Adam B Landman, Chief Information Officer, Brigham and Women's Hospital, Harvard  
18 Medical School, 75 Francis St, Boston, MA 02115, alandman@bwh.harvard.edu  
19

20  
21 Daniel B Kramer, Assistant Professor of Medicine, Harvard Medical School, Richard A. and  
22 Susan F. Smith Center for Outcomes Research in Cardiology, Beth Israel Deaconess Medical  
23 Center, Baker 4, West, 330 Brookline Ave, Boston, MA 02115, dkramer@bidmc.harvard.edu  
24

25  
26 Correspondence to: Ariel D Stern  
27

28 Keywords: Medical Devices, Software, Cybersecurity, FDA  
29

30 Word Count: 2673  
31  
32  
33  
34  
35  
36  
37  
38  
39  
40  
41  
42  
43  
44  
45  
46  
47  
48  
49  
50  
51  
52  
53  
54  
55  
56  
57  
58  
59  
60

## Structured Abstract

**Objectives:** In order to more clearly define the landscape of digital medical devices subject to U.S. Food and Drug Administration (FDA) oversight, this analysis leverages publicly-available regulatory documents to characterize the prevalence and trends of software and cybersecurity features in regulated medical devices.

**Design:** We analyzed data from publicly available FDA product summaries to understand the frequency and recent time trends of inclusion of software and cybersecurity content in publicly available product information.

**Setting:** The full set of regulated medical devices, approved over the years 2002-2016 included in the FDA's 510(k) and premarket approval databases.

**Primary and secondary outcome measures:** The primary outcome was the share of devices containing software that included cybersecurity content in their product summaries. Secondary outcomes were differences in these shares a) over time and b) across regulatory areas.

**Results:** Among regulated devices, 13.79% were identified as including software. Among these products, only 2.13% had product summaries that included cybersecurity content over the period studied. The overall share of devices including cybersecurity content was higher in recent years, growing from an average of 1.4% in the first decade of our sample to 5.5% in 2015 and 2016, the most recent years included. The share of devices including cybersecurity content also varied across regulatory areas from a low of 0% to a high of 22.2%.

**Conclusions:** To ensure the safest possible health care delivery environment for patients and hospitals, regulators and manufacturers should work together to make the software and cybersecurity content of new medical devices more easily accessible.



## Article Summary

### Strengths and limitations of this study

- Cybersecurity issues related to medical devices have been documented in a number of individual cases, but the inclusion of cybersecurity content has never been considered systematically; we provide the first such analysis.
- The study also provides a new application of the use of the Medical Text Indexer – a document classification algorithm from the U.S. National Library of Medicine – for understanding the content of medical product descriptions.
- The study’s primary limitation is that because the inclusion of cybersecurity content is not currently mandatory in FDA product summary documents, some devices may include cybersecurity features that cannot be accounted for by this analysis.

## Introduction

The United States (US) National Research Council (NRC) defines cybersecurity as “the technologies, processes, and policies that help to prevent and/or reduce the negative impact of events...that can happen as the result of deliberate actions against information technology by a hostile or malevolent actor.”<sup>1</sup> In the US, the Cybersecurity Information Sharing Act of 2015 included health care provisions (Sec. 405), requiring the Department of Health and Human Services to report to Congress regarding the preparedness of the health care industry in responding to cybersecurity threats, acknowledging these risks and laying out reporting requirements.<sup>2</sup>

In health care delivery and health care policy, cybersecurity comes up most readily in the context of health information technology. Such technology may include stand-alone software, such as electronic health record systems, or combinations of hardware and software, such as those seen in modern pacemakers, blood glucose monitors, and computed tomography scanners. In the latter category, many digital products pose sufficient risk to patients as to require regulatory approval for use. In the US, products containing both software and hardware are regulated by the US Food and Drug Administration (FDA). Importantly, digital medical devices – those that contain software and/or digital networking capabilities – are quickly becoming embedded in all facets of medical care. However, the prevalence of software and the inclusion of cybersecurity features among already-marketed regulated medical devices have not been previously investigated.

At the same time, there have been several recent examples of software-related medical device vulnerabilities,<sup>3,4</sup> including potential use of a pacemaker remote monitoring system to issue malicious programming commands.<sup>5</sup> These devices may also place health care facilities at

1  
2  
3 risk:<sup>6</sup> A recent report from a cybersecurity firm highlighted the fact that 90% of hospitals had  
4 been targeted by cybercriminals in the past two years and that 17% of these documented attacks  
5 had been facilitated by Internet-connected medical devices.<sup>7</sup> The May 2017 WannaCry  
6 ransomware attack was the largest cyberattack to affect the United Kingdom's National Health  
7 Service, impacting 34% of trusts and disrupting some medical devices, including a subset of  
8 MRI scanners and devices to test blood and tissue samples.<sup>8,9</sup>

9  
10 In recognition of these risks, the FDA has issued both pre and post-market regulatory  
11 guidance<sup>10,11</sup> on medical device cybersecurity while actively engaging industry and outside  
12 experts in addressing post-market cybersecurity concerns. In order to more clearly define the  
13 landscape of digital medical devices subject to FDA oversight, this analysis leverages publicly-  
14 available FDA documents to characterize the prevalence and trends of software and  
15 cybersecurity features in regulated medical devices.

## 16 17 18 19 20 21 22 23 24 25 26 27 28 29 30 31 32 33 **Methods**

### 34 35 *Data Sources*

36  
37 We analyzed data from publicly available FDA product summaries, identified from  
38 searchable documents published by the FDA at the time of each new device's clearance or  
39 approval for marketing.<sup>12,13</sup> Such summaries have supported previous analyses,<sup>14,15</sup> and, as  
40 outlined by FDA guidance, these summaries contain information such as indications for use, a  
41 detailed device description (including device design, material use, and physical properties),  
42 contradictions/warnings/precautions, and clinical evidence supporting the regulatory assessment  
43 of safety and effectiveness.<sup>16,17</sup> Along with the FDA-approved product label (with which a  
44 summary will share many pieces of important information), summary documents represent key  
45  
46  
47  
48  
49  
50  
51  
52  
53  
54  
55  
56  
57  
58  
59  
60

1  
2  
3 pieces of publicly available information about medical devices that have been granted marketing  
4 approval or clearance in the United States.  
5  
6

7  
8 We used the FDA's 510(k) and premarket approval (PMA) databases to identify all new  
9 device clearances and approvals from 2002-2016, respectively<sup>14,15</sup> (see **Table 1** in the  
10 **Supplementary Material**). In brief, under the FDA's risk-based framework for premarket  
11 evaluation, high-risk devices are evaluated under the PMA pathway, which includes  
12 demonstration of clinically-relevant safety and effectiveness. By contrast, medium-risk devices  
13 are generally assessed via the "510k" pathway, which evaluates whether new safety or  
14 effectiveness concerns are raised by the device at issue compared to a "substantially equivalent"  
15 device already on the market.<sup>18,19</sup> **Figure 1** of the **Supplementary Material** presents a brief  
16 overview of these pathways and their typical components. We identified the eight largest medical  
17 device categories by advisory committee of assignment. Advisory committees correspond largely  
18 to medical specialties (e.g. committees exist for cardiovascular, radiological, and orthopedic  
19 devices) and the eight largest committees accounted for over 75%<sup>14,15</sup> of all regulated devices  
20 that came to market over this period of time (see **Figure 1** for a summary of how the analysis  
21 sample was identified). Modifications to already-marketed devices approved via the "PMA  
22 supplement" pathway<sup>20</sup> were excluded.  
23  
24  
25  
26  
27  
28  
29  
30  
31  
32  
33  
34  
35  
36  
37  
38  
39  
40  
41

42 We used an automated Python script to batch download all associated product summaries  
43 and applied *ABBYY FineReader* optical character recognition software (ABBYY, Milpitas, CA)  
44 to convert these Portable Document Format (PDF) files into machine-readable text files.  
45  
46  
47  
48  
49  
50

### 51 *Analysis Sample*

52  
53  
54  
55  
56  
57  
58  
59  
60

1  
2  
3 We used the US National Institute of Health’s National Library of Medicine (NLM)  
4 *Medical Text Indexer*<sup>21</sup> (MTI) to identify digital devices as those referencing and/or describing  
5 software in their product summaries. The MTI uses natural language processing algorithms that  
6 take free text as input and provide medical subject indexing recommendations, based on the  
7 MeSH® vocabulary<sup>22</sup> established by the NLM, as output. From a regulatory perspective,  
8 products containing software must describe this in their summaries (see above). Indeed, many  
9 device summaries contain a short section of the document that is dedicated to describing the  
10 product’s software (for example, as seen for the Medtronic MiniMed 670G Automated Insulin  
11 Delivery System).<sup>23</sup> We used the sample of summaries that were flagged by the MTI as  
12 including the medical subject of “software” as our analysis sample of digital devices (“software  
13 sample”). In sensitivity analysis, an alternative, keyword-based definition was considered and  
14 did not impact findings (**Table 1 and Figure 2 of Supplementary Material**). For each product  
15 in the software sample, we recorded each device’s FDA decision date (i.e. the year in which the  
16 product came to market), its regulatory approval pathway (510(k) or PMA), and the reviewing  
17 advisory committee.  
18  
19  
20  
21  
22  
23  
24  
25  
26  
27  
28  
29  
30  
31  
32  
33  
34  
35  
36  
37  
38  
39

#### 40 *Characterization of Cybersecurity Features*

41  
42 The “cybersecurity features” of digital medical devices can take on a number of forms,  
43 each of which can address the risks of actions by malevolent parties. Such cybersecurity features  
44 may include characterizations or descriptions of a digital product’s defensive abilities (e.g. data  
45 encryption), an ability to respond to a security breach should it be attempted (e.g. antivirus  
46 software), or the ability to detect a breach that has already occurred (e.g. penetration testing).  
47  
48  
49  
50  
51  
52  
53  
54  
55  
56  
57  
58  
59  
60

1  
2  
3 We searched each of the summaries in the software sample for a pre-specified list of  
4 keywords related to cybersecurity content (**Table 2 of Supplementary Material**) and  
5 documented use of these keywords (yes/no) in each product summary. These keywords and  
6 phrases were selected *a priori* from terminology glossaries from the US National Initiative for  
7 Cybersecurity Careers and Studies (NICCS), the FDA's guidance on cybersecurity for medical  
8 devices, the US National Institute of Standards and Technology (NIST 4009 / NISTIR 7298)  
9 Glossary,<sup>24</sup> and the Manufacturer Disclosure Statement for Medical Device Security (MDS2), a  
10 multi-stakeholder devised form designed to give manufacturers a mechanism of disclosing  
11 security-related product information to healthcare providers.<sup>25</sup>  
12  
13  
14  
15  
16  
17  
18  
19  
20  
21  
22  
23  
24  
25

### 26 *Patient and Public Involvement*

27  
28 Patients were not directly involved in the design of this retrospective study of publicly-  
29 available regulatory documents. However, popular media accounts of recent cybersecurity  
30 concerns in medical devices has brought this previously-obscure topic to the attention of a wide  
31 public audience, particularly the millions of patients living with potentially affected devices.<sup>26-28</sup>  
32  
33  
34  
35  
36  
37  
38  
39

### 40 *Data Analysis*

41  
42 For each year, we identified the software sample and calculated the number and  
43 percentage (share) of devices that included cybersecurity content by advisory committee and  
44 overall. We compared the percentage of devices with cybersecurity content, as identified by  
45 keywords. Using chi-squared tests, we looked at differences between the two major regulatory  
46 approval pathways and in earlier versus later years, by comparing the first decade of the period  
47 of observation to the final two years.  
48  
49  
50  
51  
52  
53  
54  
55  
56  
57  
58  
59  
60

1  
2  
3 In order to validate our automated search protocol, we manually reviewed 100  
4 summaries. We selected 50 summaries from the software sample that were identified as  
5 containing cybersecurity information, and 50 that were identified as having no such content to  
6 confirm text scraping methods. Discrepancies were reviewed by group assent. We further  
7 validated our method of identifying devices containing software by electronically scanning all  
8 product summaries for the keyword “software” and using these results to assess the sensitivity  
9 and specificity of the MTI-defined software sample. (**Supplementary Material**).

10  
11  
12  
13  
14  
15  
16  
17  
18  
19 All statistical analyses were conducted in STATA version 14.2 (StataCorp LLC, College  
20 Station, TX).

## 21 22 23 24 25 26 **Results**

27  
28 A total of 36,430 new devices were identified (**Figure 1**) and of those, 35,794 (98.3%)  
29 had product summaries that could be converted to machine-readable text. From this sample,  
30 4,936 new devices (13.79%) were identified by the MTI as including software (9.70% of PMA  
31 devices and 13.82% of 510(k) devices. Within the software sample, we found that only 2.13% of  
32 devices had product summaries that included cybersecurity content (3.45% of PMA devices and  
33 2.12% of 510(k) devices included cybersecurity content in their summaries, however, differences  
34 between PMA and 510(k) devices were not statistically significant [ $p=0.62$ ]). Manual review  
35 confirmed that 100% of summaries included the keyword(s) found by our automated program.  
36 Relative to our keyword-based validation exercise, the MTI had a sensitivity of 100% and a  
37 specificity of 94.8%, making it a more conservative measure.

38  
39  
40  
41  
42  
43  
44  
45  
46  
47  
48  
49  
50  
51  
52 **Figure 2** presents the share of devices with software over time, while **Figure 3** presents  
53 the share of devices in the software sample that included cybersecurity content in their product  
54

1  
2  
3 summaries over the same period. The overall share of devices including cybersecurity content  
4  
5 was higher in recent years, growing from an average of 1.4% in the first decade of our sample to  
6  
7 an average of 5.5% in 2015 and 2016, the most recent years included in the sample ( $p = 0.0181$ ).  
8  
9  
10 The share of devices including cybersecurity content also varied across regulatory areas from a  
11  
12 low of 0% across all years in gastroenterology/urology devices, orthopedic devices, and  
13  
14 general/plastic surgery devices, to a high of 22.2% among general hospital devices in 2016  
15  
16 **(Table 1). Supplementary Table 2** provides additional detail of the frequencies of individual  
17  
18 keywords in the sample.  
19  
20  
21  
22  
23

## 24 **Discussion**

### 25 *Summary*

26  
27  
28 This study leverages a novel methodology to create an analyzable dataset from public  
29  
30 documents describing newly-marketed medical devices. We found that software is an  
31  
32 increasingly common component of newly approved or cleared devices, while cybersecurity  
33  
34 content in the devices' publicly available product summaries remains rare.  
35  
36

37  
38 The absence of cybersecurity information for those selecting devices is a concern because  
39  
40 it prevents both patients and clinicians from making fully informed decisions about the potential  
41  
42 risks associated with the products that they use. This dearth of information may also lead to  
43  
44 patients and clinicians to unknowingly adopt products that fail to incorporate appropriate  
45  
46 cybersecurity measures. For patients, the risks of software vulnerabilities to safety and privacy  
47  
48 can be devastating. A recent study found that hundreds of U.S. medical device recalls have been  
49  
50 attributed to software defects—including several recalls of the highest risk to patients.<sup>29</sup> Further,  
51  
52 data breaches are already a serious concern for the exposure of sensitive patient data: tens of  
53  
54  
55  
56  
57  
58  
59  
60



1  
2  
3 millions of records from HIPAA-covered entities have already experienced breaches, with the  
4 majority resulting from overt criminal activity, making this risk all the more alarming.<sup>30</sup>  
5  
6

7  
8 As more and more aspects of healthcare are digitized, the cybersecurity of our healthcare  
9 infrastructure—including medical devices—will be increasingly essential to delivering safe and  
10 effective care. Recent events such as the emergence of pacemaker vulnerabilities have  
11 highlighted both the public health implications of information security<sup>31</sup> and importance of  
12 device security.<sup>6</sup> Additionally, the recent security flaws discovered in widely-used computer  
13 processors, highlight the fact that new threats continue to emerge<sup>32</sup> and scholars have highlighted  
14 medicine as a domain where adversarial attacks may be particularly likely to unfold,<sup>33</sup> with the  
15 opportunity for significant clinical impact. Indeed, the NRC has written that “from the standpoint  
16 of an individual system or network operator, the only thing worse than being penetrated is being  
17 penetrated and not knowing about it.”<sup>1</sup> This study is an important first step in understanding the  
18 public, transparent reporting of cybersecurity features included in the software embedded in  
19 moderate- and high-risk medical devices. Indeed, our characterization of the growing  
20 importance of software among regulated devices should encourage policy-makers to buttress  
21 FDA’s resources accordingly, including support for partnerships with the Department of  
22 Homeland Security and other government, academic, and industry partners focused on  
23 anticipating and responding to emerging threats to patients and public health.  
24  
25  
26  
27  
28  
29  
30  
31  
32  
33  
34  
35  
36  
37  
38  
39  
40  
41  
42  
43  
44  
45  
46

#### 47 *Limitations*

48  
49 The key limitation of this study is that the information we collected is not a mandatory  
50 component of the documents considered. As a result, product summaries may not include all  
51 relevant details of a device’s design with respect to cybersecurity. While this information may  
52  
53  
54  
55  
56  
57  
58  
59  
60

1  
2  
3 have been present in other places, such as proprietary applications or the full, confidential FDA  
4 dossier, device summaries represent some of the primary documents available for public review,  
5  
6 and therefore play an important role in educating stakeholders, such as clinicians, purchasing  
7  
8 managers, patients, and administrators of health care systems, about the strength of safety and  
9  
10 effectiveness evidence when a new product comes to market. The potential for unobserved  
11  
12 information related to cybersecurity content is the key weakness of this study, however the  
13  
14 study's key strength is that it is, to our knowledge, the first to take a large-scale approach to  
15  
16 characterizing the availability of cybersecurity content among approved medical devices.  
17  
18  
19  
20  
21  
22  
23

#### 24 *Policy Implications*

25  
26 These findings help define the current landscape of medical device software and  
27  
28 cybersecurity features, and suggest an opportunity to better inform healthcare professionals,  
29  
30 those engaging in device procurement on behalf of hospitals and health care systems, and  
31  
32 patients, on the cybersecurity protections embedded in medical devices. In particular, recently-  
33  
34 retired FDA Commissioner, Dr. Scott Gottlieb, has publicly acknowledged the importance of the  
35  
36 availability of cybersecurity information, noting that “Securing medical devices from  
37  
38 cybersecurity threats cannot be achieved by just the FDA alone” and that “every stakeholder –  
39  
40 manufacturers, hospitals, health care providers, cybersecurity researchers and gov[ernment]  
41  
42 entities [has] a unique role to play in addressing these modern challenges.”<sup>34</sup> In the fourth quarter  
43  
44 of 2018, in response to the need to “ensure the health care sector is well positioned to proactively  
45  
46 respond when cyber vulnerabilities are identified,”<sup>35</sup> the FDA released updated guidance on the  
47  
48 content of premarket submissions for the management of cybersecurity in medical devices<sup>10</sup> and  
49  
50 the U.S. Department of Health and Human Services similarly recently released voluntary  
51  
52  
53  
54  
55  
56  
57  
58  
59  
60

1  
2  
3 guidance on cybersecurity practices for healthcare organizations<sup>36</sup>. Ongoing opportunities for the  
4 exchange of ideas and best practices among regulators, practitioners, and cybersecurity experts,  
5 such as those recently hosted by the FDA on the “management of cybersecurity in medical  
6 devices”<sup>37</sup> and collaborations between the security research and medical device communities<sup>38</sup>  
7 will be valuable for ensuring public health and a better-informed public and medical community  
8 will be crucial to ensuring the safety of medical devices moving forward.  
9

10  
11  
12 Our findings also support the case for recent proposals by US regulators to include a  
13 cybersecurity “bill of materials” in the submission of new medical devices. The proposal calls  
14 for “principles and approaches [that] are broadly applicable to all medical devices and are  
15 intended to be consistent with the National Institute of Standards and Technology (NIST)  
16 Framework for Improving Critical Infrastructure Cybersecurity.”<sup>10</sup> Such a standardized approach  
17 would represent an important step in addressing the cybersecurity information deficit that we  
18 have documented here. Further, many individual hospitals and other purchasers of medical  
19 devices currently perform independent information security assessments of medical devices - a  
20 slow, resource intensive, and costly process. Standardizing the information security review  
21 process and making the results available publicly would bring substantial efficiencies for medical  
22 device vendors and healthcare organizations.  
23  
24  
25  
26  
27  
28  
29  
30  
31  
32  
33  
34  
35  
36  
37  
38  
39  
40  
41  
42  
43

#### 44 *Looking Ahead*

45  
46  
47 In an increasingly digitized health care ecosystem, manufacturers will face increasing  
48 demands for product safety in the form of cybersecurity protections. Moreover, stakeholders  
49 will increasingly seek out information about the safety features of new products. Regulators and  
50 manufacturers should collaborate to make the software and cybersecurity content of new  
51  
52  
53  
54  
55  
56  
57  
58  
59  
60

1  
2  
3 products more easily accessible, and should continue to work together to determine which  
4  
5 cybersecurity content should be disclosed and required for regulatory clearance and approval of  
6  
7 new products moving forward. It will also be important for future researchers to closely track the  
8  
9 availability of cybersecurity content in newly-approved medical devices and to explore whether  
10  
11 the publication of such content impacts the product utilization decisions of patients and health  
12  
13 care providers.  
14  
15

### 16 17 18 **Figure Legend**

19  
20 Figure 1: Assembly of analysis sample and results

21  
22 Figure 2: Share of new devices with software (“software sample”)

23  
24 Figure 3: Share of software sample with cybersecurity content  
25  
26  
27  
28  
29  
30  
31  
32  
33  
34  
35  
36  
37  
38  
39  
40  
41  
42  
43  
44  
45  
46  
47  
48  
49  
50  
51  
52  
53  
54  
55  
56  
57  
58  
59  
60

1  
2  
3 **Author Contributions:** ADS designed the study in consultation with WJG, ABL, and DBK.

4  
5 ADS collected the data from public sources and performed the primary analysis. All authors had  
6  
7 full access to the data and analysis programs for this study and take responsibility for the  
8  
9 integrity of the data and the accuracy of the analysis. All authors wrote the manuscript.  
10  
11  
12

13  
14 **License:** The Corresponding Author has the right to grant on behalf of all authors and does grant  
15  
16 on behalf of all authors, an exclusive licence (or non exclusive for government employees) on a  
17  
18 worldwide basis to the BMJ Publishing Group Ltd ("BMJ"), and its Licensees to permit this  
19  
20 article (if accepted) to be published in *The BMJ's* editions and any other BMJ products and to  
21  
22 exploit all subsidiary rights, as set out in our licence.  
23  
24  
25

26  
27  
28 **Data Sharing Statement:** Statistical code and the full dataset are available at  
29  
30 <https://github.com/arieldora/SternCybersecurityContent>  
31  
32

33  
34  
35  
36 **Conflicts of Interest:** Dr. Landman is a member of the Abbott Medical Device Cybersecurity  
37  
38 Council. Dr. Kramer is supported by the Greenwall Faculty Scholars Program in Bioethics, is a  
39  
40 consultant to Circulatory Systems Advisory Panel of the Food and Drug Administration, and has  
41  
42 provided consulting to the Baim Institute for Clinical Research for clinical trials of medical  
43  
44 devices (unrelated to the study topic). There are no other financial or commercial financial  
45  
46 conflicts of interest related to the study topic to report.  
47  
48  
49

50  
51  
52 **Funding:** The Harvard Business School Division of Research and Faculty Development  
53  
54 supported the data collection for this study. Dr. Stern is supported by the Kauffman Junior  
55  
56  
57

1  
2  
3 Faculty Fellowship and Dr. Kramer is supported by the Greenwall Faculty Scholars Program in  
4  
5 Bioethics.  
6  
7  
8  
9  
10  
11  
12  
13  
14  
15  
16  
17  
18  
19  
20  
21  
22  
23  
24  
25  
26  
27  
28  
29  
30  
31  
32  
33  
34  
35  
36  
37  
38  
39  
40  
41  
42  
43  
44  
45  
46  
47  
48  
49  
50  
51  
52  
53  
54  
55  
56  
57  
58  
59  
60

For peer review only

## References

1. National Research Council. At the Nexus of Cybersecurity and Public Policy: Some Basic Concepts and Issues [Internet]. The National Academies Press; 2014. Available from: <https://doi.org/10.17226/18749> [accessed 10 Jul 2018].
2. Burr R. S.754 - 114th Congress (2015-2016): To improve cybersecurity in the United States through enhanced sharing of information about cybersecurity threats, and for other purposes. [Internet]. 2015. Available from: <https://www.congress.gov/bill/114th-congress/senate-bill/754> [accessed 10 Jul 2018].
3. Blau M. Hospitals brace for security risks that could come with using wearables for patient care [Internet]. STAT. 2017. Available from: <https://www.statnews.com/2017/08/04/hospitals-security-risks-wearables/> [accessed 10 Jul 2018].
4. Kuchler H. Medical device makers wake up to cyber security threat. Financial Times [Internet]. 2017 Aug 1; Available from: <https://www.ft.com/content/00989b9c-7634-11e7-90c0-90a9d1bc9691> [accessed 10 Jul 2018].
5. Kramer DB, Fu K. Cybersecurity Concerns and Medical Devices: Lessons From a Pacemaker Advisory. JAMA. 2017 Dec 5;318(21):2077–8.
6. Fox-Brewster T. Medical Devices Hit By Ransomware For The First Time In US Hospitals [Internet]. Forbes. 2017. Available from: <https://www.forbes.com/sites/thomasbrewster/2017/05/17/wannacry-ransomware-hit-real-medical-devices/#4a76dbe8425c> [accessed 10 Jul 2018].
7. IoT guardian for the healthcare industry [Internet]. ZingBox; 2016. Available from: [http://www.zingbox.com/wp-content/uploads/2017/02/ZingBox\\_WP\\_IoT-Guardian-for-the-Healthcare-Industry.pdf](http://www.zingbox.com/wp-content/uploads/2017/02/ZingBox_WP_IoT-Guardian-for-the-Healthcare-Industry.pdf) [accessed 10 Jul 2018].
8. Hughes O. WannaCry impact on NHS considerably larger than previously suggested [Internet]. Digital Health. 2017. Available from: <https://www.digitalhealth.net/2017/10/wannacry-impact-on-nhs-considerably-larger-than-previously-suggested/> [accessed 10 Jul 2018].
9. Department of Health. Investigation: WannaCry cyber attack and the NHS [Internet]. 2017 October. Report No.: HC 414. Available from: <https://www.nao.org.uk/wp-content/uploads/2017/10/Investigation-WannaCry-cyber-attack-and-the-NHS.pdf> [accessed 10 Jul 2018].
10. Food and Drug Administration. Content of Premarket Submissions for Management of Cybersecurity in Medical Devices - Guidance for Industry and Food and Drug Administration Staff. Available from: <https://www.fda.gov/downloads/medicaldevices/deviceregulationandguidance/guidancedocuments/ucm356190.pdf> [accessed 10 Jul 2018].

11. Postmarket Management of Cybersecurity in Medical Devices - Guidance for Industry and Food and Drug Administration Staff. Available from: <https://www.fda.gov/downloads/medicaldevices/deviceregulationandguidance/guidancedocuments/ucm482022.pdf> [accessed 10 Jul 2018].
12. 510(k) Premarket Notification. 2017; Available from: <https://www.accessdata.fda.gov/scripts/cdrh/cfdocs/cfPMN/pmn.cfm> [accessed 10 Jul 2018].
13. Premarket Approval (PMA). 2018; Available from: <https://www.accessdata.fda.gov/scripts/cdrh/cfdocs/cfPMA/pma.cfm> [accessed 10 Jul 2018].
14. Zheng SY, Dhruva SS, Redberg RF. Characteristics of Clinical Studies Used for US Food and Drug Administration Approval of High-Risk Medical Device Supplements. *JAMA*. 2017 Aug 15;318(7):619–25.
15. Dhruva SS, Bero LA, Redberg RF. Strength of study evidence examined by the FDA in premarket approval of cardiovascular devices. *JAMA*. 2009 Dec 23;302(24):2679–85.
16. Content of a 510(k). 2017 Oct 31; Available from: [https://www.fda.gov/MedicalDevices/DeviceRegulationandGuidance/HowtoMarketYourDevice/PremarketSubmissions/PremarketNotification510k/ucm142651.htm#link\\_7](https://www.fda.gov/MedicalDevices/DeviceRegulationandGuidance/HowtoMarketYourDevice/PremarketSubmissions/PremarketNotification510k/ucm142651.htm#link_7) [accessed 10 Jul 2018].
17. PMA Application Contents. 2018 Feb 2; Available from: <https://www.fda.gov/MedicalDevices/DeviceRegulationandGuidance/HowtoMarketYourDevice/PremarketSubmissions/PremarketApprovalPMA/ucm050289.htm#ssed> [accessed 10 Jul 2018].
18. Kramer DB, Kesselheim AS. User Fees and Beyond — The FDA Safety and Innovation Act of 2012. *N Engl J Med*. 2012 Oct 4;367(14):1277–9.
19. Kramer DB, Xu S, Kesselheim AS. Regulation of Medical Devices in the United States and European Union. *N Engl J Med*. 2012 Mar 1;366(9):848–55.
20. Rome BN, Kramer DB, Kesselheim AS. FDA approval of cardiac implantable electronic devices via original and supplement premarket approval pathways, 1979-2012. *JAMA*. 2014 Jan 22;311(4):385–91.
21. NLM Medical Text Indexer (MTI). 2018; Available from: <https://ii.nlm.nih.gov/MTI> [accessed 10 Jul 2018].
22. MeSH [Internet]. [cited 2018 Feb 5]. Available from: <https://www.ncbi.nlm.nih.gov/mesh> [accessed 10 Jul 2018].
23. Summary of Safety and Effectiveness Data (SSED) [Internet]. Available from: [https://www.accessdata.fda.gov/cdrh\\_docs/pdf10/P100034b.pdf](https://www.accessdata.fda.gov/cdrh_docs/pdf10/P100034b.pdf) [accessed 10 Jul 2018].
24. Kissel R. Glossary of Key Information Security Terms [Internet]. 2013 p. 1–218. Available from: <http://nvlpubs.nist.gov/nistpubs/ir/2013/NIST.IR.7298r2.pdf> [accessed 10 Jul 2018].



- 1  
2  
3 25. Manufacturer Disclosure Statement for Medical Device Security (MDS2). 2017;  
4 Available from: <http://www.himss.org/resourcelibrary/MDS2> [accessed 10 Jul 2018].  
5
- 6 26. How medical devices like pacemakers and insulin pumps can be hacked [Internet]. CBS  
7 News. Available from: [https://www.cbsnews.com/news/cybersecurity-researchers-show-](https://www.cbsnews.com/news/cybersecurity-researchers-show-medical-devices-hacking-vulnerabilities/)  
8 [medical-devices-hacking-vulnerabilities/](https://www.cbsnews.com/news/cybersecurity-researchers-show-medical-devices-hacking-vulnerabilities/) [accessed 29 Jan 2019].  
9
- 10 27. Gellman L. Insecure Medical Devices Vulnerable to Malicious Hacking [Internet].  
11 Available from: [http://nymag.com/intelligencer/2018/08/insecure-medical-devices-vulnerable-to-](http://nymag.com/intelligencer/2018/08/insecure-medical-devices-vulnerable-to-malicious-hacking.html)  
12 [malicious-hacking.html](http://nymag.com/intelligencer/2018/08/insecure-medical-devices-vulnerable-to-malicious-hacking.html) [accessed 29 Jan 2019].  
13  
14
- 15 28. Innes S. “Ethical hackers” are working to warn physicians about cyberattacks [Internet].  
16 2018. Available from: [https://www.azcentral.com/story/news/local/arizona-](https://www.azcentral.com/story/news/local/arizona-health/2018/12/27/ethical-hackers-warn-physicians-cyberattacks-christian-dameff-arizona-college-medicine-jeff-tully/2277625002/)  
17 [health/2018/12/27/ethical-hackers-warn-physicians-cyberattacks-christian-dameff-arizona-](https://www.azcentral.com/story/news/local/arizona-health/2018/12/27/ethical-hackers-warn-physicians-cyberattacks-christian-dameff-arizona-college-medicine-jeff-tully/2277625002/)  
18 [college-medicine-jeff-tully/2277625002/](https://www.azcentral.com/story/news/local/arizona-health/2018/12/27/ethical-hackers-warn-physicians-cyberattacks-christian-dameff-arizona-college-medicine-jeff-tully/2277625002/) [accessed 29 Jan 2019].  
19  
20
- 21 29. Ronquillo JG, Zuckerman DM. Software-Related Recalls of Health Information  
22 Technology and Other Medical Devices: Implications for FDA Regulation of Digital Health.  
23 *Milbank Q.* 2017;95(3):535–53.  
24
- 25 30. Liu V, Musen MA, Chou T. Data breaches of protected health information in the United  
26 States. *JAMA.* 2015 Apr 14;313(14):1471–3.  
27
- 28 31. Gordon WJ, Fairhall A, Landman A. Threats to Information Security — Public Health  
29 Implications. *N Engl J Med.* 2017 Aug 24;377(8):707–9.  
30
- 31 32. Finlayson SG, Won Chung H, Kohane IS, Beam AL. Adversarial Attacks Against  
32 Medical Deep Learning Systems. *arXiv* [Internet]. 2018 May 21 [cited 2019 Jan 31]; Available  
33 from: <https://arxiv.org/abs/1804.05296> [accessed 29 Jan 2019].  
34  
35
- 36 33. Metz C, Perlroth N. Researchers Discover Two Major Flaws in the World’s Computers.  
37 *The New York Times* [Internet]. 2018 Jan 3; Available from:  
38 <https://www.nytimes.com/2018/01/03/business/computer-flaws.html> [accessed 10 Jul 2019].  
39
- 40 34. Scott Gottlieb, M.D. on Twitter: “4/4 Securing medical devices from cybersecurity  
41 threats cannot be achieved by just the #FDA alone. Every stakeholder—manufacturers, hospitals,  
42 health care providers, cybersecurity researchers and govt entities – all have a unique role to play  
43 in addressing these modern challenges” [Internet]. 2018. Available from:  
44 <https://twitter.com/SGottliebFDA/status/1046847875840450560> [accessed 29 Jan 2019].  
45  
46
- 47 35. FDA In Brief: FDA proposes updated cybersecurity recommendations to help ensure  
48 device manufacturers are adequately addressing evolving cybersecurity threats [Internet]. 2018.  
49 Available from: <https://www.fda.gov/NewsEvents/Newsroom/FDAInBrief/ucm623624.htm>  
50 [accessed 29 Jan 2019].  
51  
52
- 53 36. Health Industry Cybersecurity Practices: Managing Threats and Protecting Patients. 36.  
54 Available from: [https://www.phe.gov/Preparedness/planning/405d/Documents/HICP-Main-](https://www.phe.gov/Preparedness/planning/405d/Documents/HICP-Main-508.pdf)  
55 [508.pdf](https://www.phe.gov/Preparedness/planning/405d/Documents/HICP-Main-508.pdf) [accessed 29 Jan 2019].  
56  
57

- 1  
2  
3 37. Workshops & Conferences (Medical Devices) > Public Workshop - Content of Premarket  
4 Submissions for Management of Cybersecurity in Medical Devices January 29-30, 2019  
5 [Internet]. Available from:  
6 <https://www.fda.gov/MedicalDevices/NewsEvents/WorkshopsConferences/ucm623171.htm>  
7 [accessed 29 Jan 2019].  
8  
9  
10 38. #WeHeartHackers | A collaborative movement between the medical device and security  
11 researcher communities. [Internet]. [cited 2019 Jan 31]. Available from:  
12 <http://wehearthackers.org/> [accessed 29 Jan 2019].  
13  
14  
15  
16  
17  
18  
19  
20  
21  
22  
23  
24  
25  
26  
27  
28  
29  
30  
31  
32  
33  
34  
35  
36  
37  
38  
39  
40  
41  
42  
43  
44  
45  
46  
47  
48  
49  
50  
51  
52  
53  
54  
55  
56  
57  
58  
59  
60

**Table 1: Number of devices with machine-readable summaries by FDA/CDRH Advisory Committee and year, share with software and share of software sample with cybersecurity content by Advisory Committee**

|                                                     |                         | FDA/CDRH Advisory Committee |             |                                |                       |                 |                |             | General, Plastic Surgery |
|-----------------------------------------------------|-------------------------|-----------------------------|-------------|--------------------------------|-----------------------|-----------------|----------------|-------------|--------------------------|
| Year                                                | Clinical Chemistry (CH) | Cardiovascular (CV)         | Dental (DE) | Gastroenterology, Urology (GU) | General Hospital (HO) | Orthopedic (OR) | Radiology (RA) | (SU)        |                          |
| 2002                                                | 216                     | 436                         | 318         | 215                            | 328                   | 403             | 290            | 367         |                          |
| 2003                                                | 192                     | 441                         | 295         | 233                            | 329                   | 389             | 329            | 357         |                          |
| 2004                                                | 204                     | 395                         | 284         | 195                            | 270                   | 464             | 345            | 319         |                          |
| 2005                                                | 155                     | 389                         | 245         | 166                            | 262                   | 480             | 310            | 331         |                          |
| 2006                                                | 197                     | 412                         | 293         | 142                            | 244                   | 442             | 338            | 362         |                          |
| 2007                                                | 153                     | 358                         | 283         | 160                            | 257                   | 444             | 271            | 319         |                          |
| 2008                                                | 149                     | 387                         | 279         | 139                            | 207                   | 477             | 325            | 370         |                          |
| 2009                                                | 130                     | 442                         | 268         | 155                            | 254                   | 432             | 290            | 316         |                          |
| 2010                                                | 121                     | 390                         | 245         | 157                            | 280                   | 428             | 235            | 312         |                          |
| 2011                                                | 163                     | 428                         | 258         | 141                            | 241                   | 542             | 347            | 285         |                          |
| 2012                                                | 155                     | 426                         | 240         | 166                            | 282                   | 551             | 344            | 302         |                          |
| 2013                                                | 185                     | 428                         | 235         | 153                            | 202                   | 554             | 346            | 301         |                          |
| 2014                                                | 130                     | 400                         | 225         | 199                            | 245                   | 583             | 385            | 342         |                          |
| 2015                                                | 108                     | 392                         | 244         | 179                            | 174                   | 575             | 340            | 322         |                          |
| 2016                                                | 95                      | 368                         | 230         | 171                            | 204                   | 464             | 375            | 354         |                          |
| <b>Totals</b>                                       | <b>2353</b>             | <b>6092</b>                 | <b>3942</b> | <b>2571</b>                    | <b>3779</b>           | <b>7228</b>     | <b>4870</b>    | <b>4959</b> |                          |
| Share with software ("software sample")             | 9.14%                   | 18.99%                      | 4.59%       | 8.01%                          | 4.97%                 | 1.36%           | 52.28%         | 6.96%       |                          |
| Share of software sample with cybersecurity content | 7.91%                   | 2.51%                       | 1.66%       | 0.00%                          | 2.13%                 | 0.00%           | 2.04%          | 0.00%       |                          |

1  
2  
3  
4  
5  
6  
7  
8  
9  
10  
11  
12  
13  
14  
15  
16  
17  
18  
19  
20  
21  
22  
23  
24  
25  
26  
27  
28  
29  
30  
31  
32  
33  
34  
35  
36  
37  
38  
39  
40  
41  
42  
43  
44  
45  
46  
47

For peer review only

1  
2  
3  
4  
5  
6  
7  
8  
9  
10  
11  
12  
13  
14  
15  
16  
17  
18  
19  
20  
21  
22  
23  
24  
25  
26  
27  
28  
29  
30  
31  
32  
33  
34  
35  
36  
37  
38  
39  
40  
41  
42  
43  
44  
45  
46  
47  
48  
49  
50  
51  
52  
53  
54  
55  
56  
57  
58  
59  
60

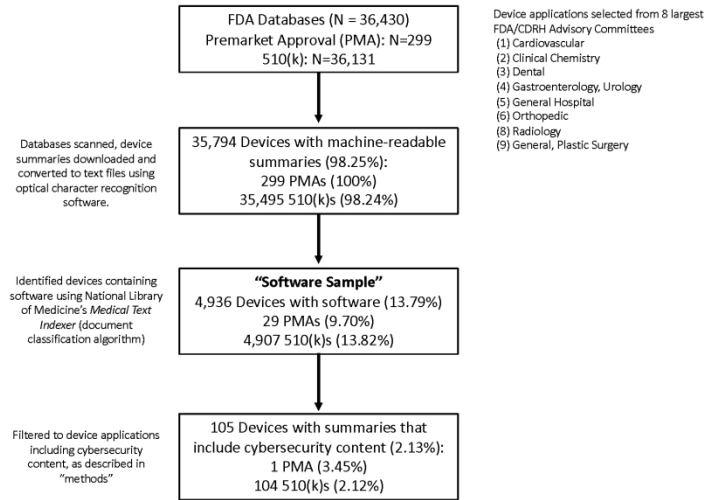

Figure 1: Assembly of analysis sample and results

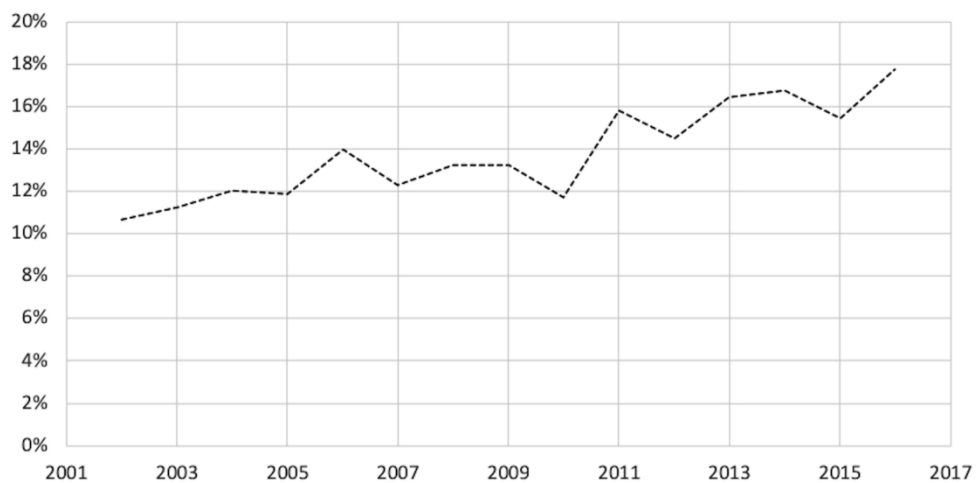

Figure 2: Share of new devices with software ("software sample")

1  
2  
3  
4  
5  
6  
7  
8  
9  
10  
11  
12  
13  
14  
15  
16  
17  
18  
19  
20  
21  
22  
23  
24  
25  
26  
27  
28  
29  
30  
31  
32  
33  
34  
35  
36  
37  
38  
39  
40  
41  
42  
43  
44  
45  
46  
47  
48  
49  
50  
51  
52  
53  
54  
55  
56  
57  
58  
59  
60

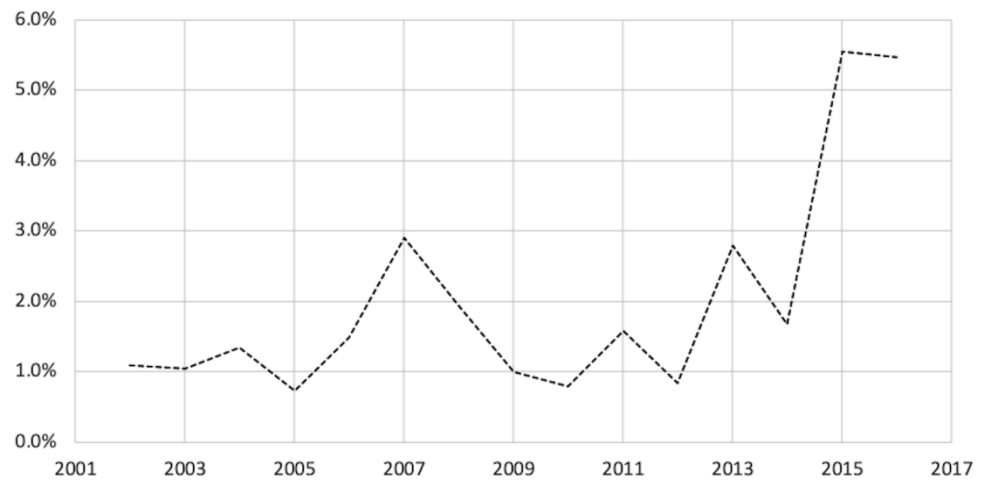

Figure 3: Share of software sample with cybersecurity content

## Supplementary Material

### I. Processing Using the Medical Text Indexer (MTI)

We sent each of our optical character recognition-processed text files to the MTI and recorded which summaries were classified as being related to software in the MeSH® Tree (ontology). We flagged all products whose summaries were assigned to the “software” MeSH® term, number L01.224.900.

### II. Sensitivity Analysis

In sensitivity analyses we considered an alternate method of identifying devices containing software. For this exercise, we electronically scanned each product summary for the keyword “software” and recorded whether the word “software” appeared anywhere within a device’s product summary (i.e. at least once in the document).

We expected that the MTI-driven method of identifying the “software sample” would have a high sensitivity but a lower specificity relative to the keyword-based method for the following reason: in order for a text document to be flagged by the MTI’s algorithm as being related to the subject of “software” the text document would need describe relevant software content in some detail – i.e. often beyond simply utilizing the keyword “software” at least once.

Indeed, the keyword-based method of identifying software products captured 100% of the products that were identified as including software using the MTI results, but also identified additional products that employ the word “software” in their product summaries at least once (**Supplementary Table**).

Relative to the keyword method, we conclude that the MTI-based method of identifying software products had a 100% sensitivity, but only a 94.8% specificity in our sample. Given the high sensitivity of this method, the MTI-based software sample is the more conservative method for identifying devices with software. However, alternative results using the keyword-based definition are highly similar to those obtained using the MTI-based definition. The total share of the software device sample that includes cybersecurity content is statistically indistinguishable in every year of the sample and visibly similar over time (**Supplementary Table and Supplementary Figure**)



**Supplementary Table 1: Comparison of MTI and Keyword-based Methods of Identifying Software over Time**

| Year   | Total Devices | Software sample (MTI defined) | Software sample (keyword defined) | Total devices with cybersecurity content (MTI) | % with cybersecurity content (MTI sample) | Total devices with cybersecurity content (keyword sample) | % with cybersecurity content (keyword) |
|--------|---------------|-------------------------------|-----------------------------------|------------------------------------------------|-------------------------------------------|-----------------------------------------------------------|----------------------------------------|
| 2002   | 2573          | 275                           | 318                               | 3                                              | 1.09%                                     | 3                                                         | 0.94%                                  |
| 2003   | 2565          | 289                           | 347                               | 3                                              | 1.04%                                     | 4                                                         | 1.15%                                  |
| 2004   | 2476          | 298                           | 350                               | 4                                              | 1.34%                                     | 4                                                         | 1.14%                                  |
| 2005   | 2338          | 277                           | 323                               | 2                                              | 0.72%                                     | 3                                                         | 0.93%                                  |
| 2006   | 2430          | 339                           | 397                               | 5                                              | 1.47%                                     | 5                                                         | 1.26%                                  |
| 2007   | 2245          | 276                           | 314                               | 8                                              | 2.90%                                     | 8                                                         | 2.55%                                  |
| 2008   | 2333          | 309                           | 371                               | 6                                              | 1.94%                                     | 8                                                         | 2.16%                                  |
| 2009   | 2287          | 303                           | 373                               | 3                                              | 0.99%                                     | 3                                                         | 0.80%                                  |
| 2010   | 2168          | 254                           | 356                               | 2                                              | 0.79%                                     | 5                                                         | 1.40%                                  |
| 2011   | 2405          | 380                           | 524                               | 6                                              | 1.58%                                     | 7                                                         | 1.34%                                  |
| 2012   | 2466          | 357                           | 526                               | 3                                              | 0.84%                                     | 6                                                         | 1.14%                                  |
| 2013   | 2404          | 395                           | 597                               | 11                                             | 2.78%                                     | 15                                                        | 2.51%                                  |
| 2014   | 2509          | 421                           | 635                               | 7                                              | 1.66%                                     | 17                                                        | 2.68%                                  |
| 2015   | 2334          | 361                           | 636                               | 20                                             | 5.54%                                     | 33                                                        | 5.19%                                  |
| 2016   | 2261          | 402                           | 721                               | 22                                             | 5.47%                                     | 43                                                        | 5.96%                                  |
| Totals | 35794         | 4936                          | 6788                              | 105                                            | 2.13%                                     | 164                                                       | 2.42%                                  |

**Supplementary Table 2: List of keywords related to cybersecurity content:**

| Source | Term                          | Allowable alternative(s)                          | Counts |
|--------|-------------------------------|---------------------------------------------------|--------|
| NICCS  | access control                |                                                   | 17     |
| NICCS  | active attack                 |                                                   | 0      |
| NICCS  | air gap                       |                                                   | 5      |
| NICCS  | antispymware software         | anti-spyware software, anti-spyware, antispymware | 1      |
| NICCS  | antivirus software            | anti-virus software, anti-virus, antivirus        | 3      |
| NICCS  | asymmetric cryptography       |                                                   | 0      |
| NICCS  | cipher                        |                                                   | 0      |
| NICCS  | computer network defense      |                                                   | 0      |
| NICCS  | computer security incident    |                                                   | 0      |
| NICCS  | cryptanalysis                 |                                                   | 0      |
| NICCS  | cryptographic algorithm       |                                                   | 0      |
| NICCS  | cryptography                  |                                                   | 1      |
| NICCS  | cyber ecosystem               |                                                   | 0      |
| NICCS  | cyber exercise                |                                                   | 0      |
| NICCS  | cyber incident                | cyber-incident                                    | 0      |
| NICCS  | cyber infrastructure          | cyber-infrastructure                              | 0      |
| NICCS  | cybersecurity                 | cyber-security                                    | 58     |
| NICCS  | data breach                   |                                                   | 0      |
| NICCS  | data leakage                  |                                                   | 0      |
| NICCS  | data theft                    | data-theft                                        | 0      |
| NICCS  | decrypt                       |                                                   | 3      |
| NICCS  | denial of service             | denial-of-service                                 | 0      |
| NICCS  | designed-in security          | designed in security                              | 0      |
| NICCS  | digital forensics             |                                                   | 0      |
| NICCS  | distributed denial of service | distributed denial-of-service, DDOS, D.D.O.S.     | 0      |
| NICCS  | dynamic attack surface        |                                                   | 0      |

|    |              |                                                                    |                                                              |     |
|----|--------------|--------------------------------------------------------------------|--------------------------------------------------------------|-----|
| 1  |              |                                                                    |                                                              |     |
| 2  |              |                                                                    |                                                              |     |
| 3  |              |                                                                    |                                                              |     |
| 4  | NICCS        | encrypt                                                            |                                                              | 44  |
| 5  | NICCS        | enterprise risk management                                         |                                                              | 0   |
| 6  | NICCS        | exploitation analysis                                              |                                                              | 0   |
| 7  | NICCS        | identity and access management                                     |                                                              | 0   |
| 8  | NICCS        | information security policy                                        |                                                              | 0   |
| 9  | NICCS        | information system resilience                                      | Information Systems Security                                 | 0   |
| 10 | NICCS        | Information Systems Security Operations                            |                                                              | 0   |
| 11 | NICCS        | intrusion detection                                                |                                                              | 0   |
| 12 | NICCS        | malicious code                                                     |                                                              | 0   |
| 13 | NICCS        | malware                                                            |                                                              | 0   |
| 14 | NICCS        | NICCS                                                              | National Initiative for Cybersecurity Careers and Study      | 0   |
| 15 | NICCS        | penetration testing                                                |                                                              | 83  |
| 16 | NICCS        | phishing                                                           |                                                              | 0   |
| 17 | NICCS        | security incident                                                  |                                                              | 0   |
| 18 | NICCS        | security policy                                                    |                                                              | 0   |
| 19 | NICCS        | spyware                                                            | spy-ware                                                     | 0   |
| 20 | NICCS        | symmetric cryptography                                             |                                                              | 0   |
| 21 | NICCS        | symmetric encryption algorithm                                     |                                                              | 0   |
| 22 | NICCS        | symmetric key                                                      |                                                              | 0   |
| 23 | NICCS        | systems security architecture                                      |                                                              | 0   |
| 24 | NICCS        | threat assessment                                                  |                                                              | 0   |
| 25 | NICCS        | cybersecurity routine updates and patches                          | cybersecurity routine updates, cybersecurity routine patches | 0   |
| 26 | FDA Guidance | cybersecurity signal                                               |                                                              | 0   |
| 27 | FDA Guidance | exploit                                                            |                                                              | 2   |
| 28 | FDA Guidance | Information Sharing Analysis Organizations                         | ISAO, ISAOs                                                  | 2   |
| 29 | FDA Guidance | NIST                                                               | National Institute of Standards and Technology               | 150 |
| 30 | FDA Guidance | NIST Framework for Improving Critical Infrastructure Cybersecurity |                                                              | 0   |
| 31 |              |                                                                    |                                                              |     |
| 32 |              |                                                                    |                                                              |     |
| 33 |              |                                                                    |                                                              |     |
| 34 |              |                                                                    |                                                              |     |
| 35 |              |                                                                    |                                                              |     |
| 36 |              |                                                                    |                                                              |     |
| 37 |              |                                                                    |                                                              |     |
| 38 |              |                                                                    |                                                              |     |
| 39 |              |                                                                    |                                                              |     |
| 40 |              |                                                                    |                                                              |     |
| 41 |              |                                                                    |                                                              |     |
| 42 |              |                                                                    |                                                              |     |
| 43 |              |                                                                    |                                                              |     |
| 44 |              |                                                                    |                                                              |     |
| 45 |              |                                                                    |                                                              |     |
| 46 |              |                                                                    |                                                              |     |
| 47 |              |                                                                    |                                                              |     |

Supplementary Figure 1: FDA medical device approval pathways

| <b>Regulatory Pathways for Medical Devices in the United States</b>                                                                                                                                                                                                                                                                                                                                                                                                                                                                                                                                                                                                                                                                                                                                                                                                                                                                                                                                                                                                                                                                                                                                    |                                                                                                                            |                                                                                          |
|--------------------------------------------------------------------------------------------------------------------------------------------------------------------------------------------------------------------------------------------------------------------------------------------------------------------------------------------------------------------------------------------------------------------------------------------------------------------------------------------------------------------------------------------------------------------------------------------------------------------------------------------------------------------------------------------------------------------------------------------------------------------------------------------------------------------------------------------------------------------------------------------------------------------------------------------------------------------------------------------------------------------------------------------------------------------------------------------------------------------------------------------------------------------------------------------------------|----------------------------------------------------------------------------------------------------------------------------|------------------------------------------------------------------------------------------|
| Pathway                                                                                                                                                                                                                                                                                                                                                                                                                                                                                                                                                                                                                                                                                                                                                                                                                                                                                                                                                                                                                                                                                                                                                                                                | 510(k)<br>(Premarket Notification)                                                                                         | PMA<br>(Premarket Approval)                                                              |
| Products                                                                                                                                                                                                                                                                                                                                                                                                                                                                                                                                                                                                                                                                                                                                                                                                                                                                                                                                                                                                                                                                                                                                                                                               | Typically moderate-risk ("class II") devices                                                                               | Typically high-risk ("class III") devices                                                |
| Requirements                                                                                                                                                                                                                                                                                                                                                                                                                                                                                                                                                                                                                                                                                                                                                                                                                                                                                                                                                                                                                                                                                                                                                                                           | Typically do not necessitate full clinical trials, but require evidence of "substantial equivalence" to a predicate device | Typically require clinical trials to demonstrate a new device's safety and effectiveness |
| Product development time to market                                                                                                                                                                                                                                                                                                                                                                                                                                                                                                                                                                                                                                                                                                                                                                                                                                                                                                                                                                                                                                                                                                                                                                     | 31 months                                                                                                                  | 54 months                                                                                |
| Sources:<br><p>Maisel WH. Medical device regulation: an introduction for the practicing physician. <i>Annals of internal medicine</i>. 2004 Feb 17;140(4):296-302.<br/> <a href="https://www.fda.gov/MedicalDevices/DeviceRegulationandGuidance/HowtoMarketYourDevice/PremarketSubmissions/PremarketNotification510k">https://www.fda.gov/MedicalDevices/DeviceRegulationandGuidance/HowtoMarketYourDevice/PremarketSubmissions/PremarketNotification510k</a><br/> <a href="https://www.fda.gov/medicaldevices/deviceregulationandguidance/howtomarketyourdevice/premarket submissions/premarketapprovalpma">https://www.fda.gov/medicaldevices/deviceregulationandguidance/howtomarketyourdevice/premarket submissions/premarketapprovalpma</a></p> <p>Makower J, Meer A, Denend L. FDA impact on US medical technology innovation: a survey of over 200 medical technology companies. <i>Advanced Medical Technology Association</i>, Washington, DC, available at: <a href="http://www.advamed.org/NR/rdonlyres/040E6C33-380B-4F6B-AB58-9AB1C0A7A3CF/0/makowerreportfinal.pdf">http://www.advamed.org/NR/rdonlyres/040E6C33-380B-4F6B-AB58-9AB1C0A7A3CF/0/makowerreportfinal.pdf</a>. 2010 Nov.</p> |                                                                                                                            |                                                                                          |

Supplementary Figure 2: comparison of main results using alternative method of identifying the software sample

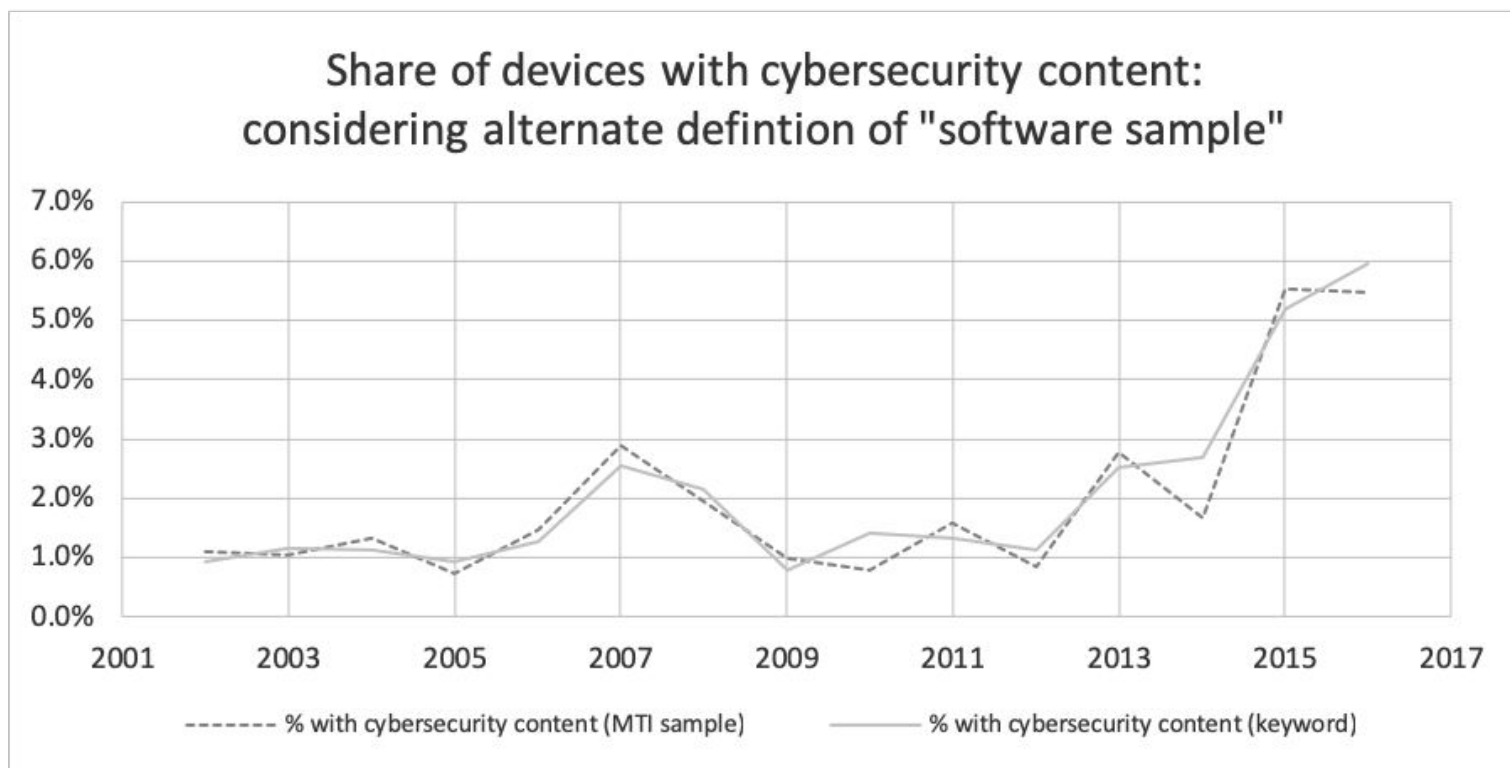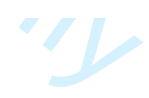

Supplement: bmjopen-2018-025374.draft_revisions.pdf [file bmjopen-2018-025374.draft_revisions.pdf]
