# Supplementary material for: Cybersecurity features of digital medical devices: an analysis of FDA product summaries
Source: PubMed Central journal article supplement — BMJ Open. 2019 Jun 28;9(6):e025374. doi: 10.1136/bmjopen-2018-025374 (PMC6609083; doi:10.1136/bmjopen-2018-025374), 2019-06-28

## Supplementary Material

### I. Processing Using the Medical Text Indexer (MTI)

We sent each of our optical character recognition-processed text files to the MTI and recorded which summaries were classified as being related to software in the MeSH® Tree (ontology). We flagged all products whose summaries were assigned to the “software” MeSH® term, number L01.224.900.

### II. Sensitivity Analysis

In sensitivity analyses we considered an alternate method of identifying devices containing software. For this exercise, we electronically scanned each product summary for the keyword “software” and recorded whether the word “software” appeared anywhere within a device’s product summary (i.e. at least once in the document).

We expected that the MTI-driven method of identifying the “software sample” would have a high sensitivity but a lower specificity relative to the keyword-based method for the following reason: in order for a text document to be flagged by the MTI’s algorithm as being related to the subject of “software” the text document would need describe relevant software content in some detail – i.e. often beyond simply utilizing the keyword “software” at least once.

Indeed, the keyword-based method of identifying software products captured 100% of the products that were identified as including software using the MTI results, but also identified additional products that employ the word “software” in their product summaries at least once (**Supplementary Table**).

Relative to the keyword method, we conclude that the MTI-based method of identifying software products had a 100% sensitivity, but only a 94.8% specificity in our sample. Given the high sensitivity of this method, the MTI-based software sample is the more conservative method for identifying devices with software. However, alternative results using the keyword-based definition are highly similar to those obtained using the MTI-based definition. The total share of the software device sample that includes cybersecurity content is statistically indistinguishable in every year of the sample and visibly similar over time (**Supplementary Table and Supplementary Figure**)

**Supplementary Table 1: Comparison of MTI and Keyword-based Methods of Identifying Software over Time**

| Year   | Total Devices | Software sample (MTI defined) | Software sample (keyword defined) | Total devices with cybersecurity content (MTI) | % with cybersecurity content (MTI sample) | Total devices with cybersecurity content (keyword sample) | % with cybersecurity content (keyword) |
|--------|---------------|-------------------------------|-----------------------------------|------------------------------------------------|-------------------------------------------|-----------------------------------------------------------|----------------------------------------|
| 2002   | 2573          | 275                           | 318                               | 3                                              | 1.09%                                     | 3                                                         | 0.94%                                  |
| 2003   | 2565          | 289                           | 347                               | 3                                              | 1.04%                                     | 4                                                         | 1.15%                                  |
| 2004   | 2476          | 298                           | 350                               | 4                                              | 1.34%                                     | 4                                                         | 1.14%                                  |
| 2005   | 2338          | 277                           | 323                               | 2                                              | 0.72%                                     | 3                                                         | 0.93%                                  |
| 2006   | 2430          | 339                           | 397                               | 5                                              | 1.47%                                     | 5                                                         | 1.26%                                  |
| 2007   | 2245          | 276                           | 314                               | 8                                              | 2.90%                                     | 8                                                         | 2.55%                                  |
| 2008   | 2333          | 309                           | 371                               | 6                                              | 1.94%                                     | 8                                                         | 2.16%                                  |
| 2009   | 2287          | 303                           | 373                               | 3                                              | 0.99%                                     | 3                                                         | 0.80%                                  |
| 2010   | 2168          | 254                           | 356                               | 2                                              | 0.79%                                     | 5                                                         | 1.40%                                  |
| 2011   | 2405          | 380                           | 524                               | 6                                              | 1.58%                                     | 7                                                         | 1.34%                                  |
| 2012   | 2466          | 357                           | 526                               | 3                                              | 0.84%                                     | 6                                                         | 1.14%                                  |
| 2013   | 2404          | 395                           | 597                               | 11                                             | 2.78%                                     | 15                                                        | 2.51%                                  |
| 2014   | 2509          | 421                           | 635                               | 7                                              | 1.66%                                     | 17                                                        | 2.68%                                  |
| 2015   | 2334          | 361                           | 636                               | 20                                             | 5.54%                                     | 33                                                        | 5.19%                                  |
| 2016   | 2261          | 402                           | 721                               | 22                                             | 5.47%                                     | 43                                                        | 5.96%                                  |
| Totals | 35794         | 4936                          | 6788                              | 105                                            | 2.13%                                     | 164                                                       | 2.42%                                  |

**Supplementary Table 2: List of keywords related to cybersecurity content:**

| Source | Term                          | Allowable alternative(s)                         | Counts |
|--------|-------------------------------|--------------------------------------------------|--------|
| NICCS  | access control                |                                                  | 17     |
| NICCS  | active attack                 |                                                  | 0      |
| NICCS  | air gap                       |                                                  | 5      |
| NICCS  | antispyware software          | anti-spyware software, anti-spyware, antispyware | 1      |
| NICCS  | antivirus software            | anti-virus software, anti-virus, antivirus       | 3      |
| NICCS  | asymmetric cryptography       |                                                  | 0      |
| NICCS  | cipher                        |                                                  | 0      |
| NICCS  | computer network defense      |                                                  | 0      |
| NICCS  | computer security incident    |                                                  | 0      |
| NICCS  | cryptanalysis                 |                                                  | 0      |
| NICCS  | cryptographic algorithm       |                                                  | 0      |
| NICCS  | cryptography                  |                                                  | 1      |
| NICCS  | cyber ecosystem               |                                                  | 0      |
| NICCS  | cyber exercise                |                                                  | 0      |
| NICCS  | cyber incident                | cyber-incident                                   | 0      |
| NICCS  | cyber infrastructure          | cyber-infrastructure                             | 0      |
| NICCS  | cybersecurity                 | cyber-security                                   | 58     |
| NICCS  | data breach                   |                                                  | 0      |
| NICCS  | data leakage                  |                                                  | 0      |
| NICCS  | data theft                    | data-theft                                       | 0      |
| NICCS  | decrypt                       |                                                  | 3      |
| NICCS  | denial of service             | denial-of-service                                | 0      |
| NICCS  | designed-in security          | designed in security                             | 0      |
| NICCS  | digital forensics             |                                                  | 0      |
| NICCS  | distributed denial of service | distributed denial-of-service, DDOS, D.D.O.S.    | 0      |
| NICCS  | dynamic attack surface        |                                                  | 0      |

|              |                                            |                                                                                                        |     |
|--------------|--------------------------------------------|--------------------------------------------------------------------------------------------------------|-----|
| NICCS        | encrypt                                    |                                                                                                        | 44  |
| NICCS        | enterprise risk management                 |                                                                                                        | 0   |
| NICCS        | exploitation analysis                      |                                                                                                        | 0   |
| NICCS        | identity and access management             |                                                                                                        | 0   |
| NICCS        | information security policy                |                                                                                                        | 0   |
| NICCS        | information system resilience              | Information Systems Security                                                                           | 0   |
| NICCS        | Information Systems Security Operations    |                                                                                                        | 0   |
| NICCS        | intrusion detection                        |                                                                                                        | 0   |
| NICCS        | malicious code                             |                                                                                                        | 0   |
| NICCS        | malware                                    |                                                                                                        | 0   |
| NICCS        | NICCS                                      | National Initiative for Cybersecurity Careers and Study                                                | 0   |
| NICCS        | penetration testing                        |                                                                                                        | 83  |
| NICCS        | phishing                                   |                                                                                                        | 0   |
| NICCS        | security incident                          |                                                                                                        | 0   |
| NICCS        | security policy                            |                                                                                                        | 0   |
| NICCS        | spyware                                    | spy-ware                                                                                               | 0   |
| NICCS        | symmetric cryptography                     |                                                                                                        | 0   |
| NICCS        | symmetric encryption algorithm             |                                                                                                        | 0   |
| NICCS        | symmetric key                              |                                                                                                        | 0   |
| NICCS        | systems security architecture              |                                                                                                        | 0   |
| NICCS        | threat assessment                          |                                                                                                        | 0   |
| FDA Guidance | cybersecurity routine updates and patches  | cybersecurity routine updates, cybersecurity routine patches                                           | 0   |
| FDA Guidance | cybersecurity signal                       |                                                                                                        | 0   |
| FDA Guidance | exploit                                    |                                                                                                        | 2   |
| FDA Guidance | Information Sharing Analysis Organizations | ISAO, ISAOs                                                                                            | 2   |
| FDA Guidance | NIST                                       | National Institute of Standards and Technology<br>NIST Framework for Improving Critical Infrastructure | 150 |
| FDA Guidance | NIST Framework                             | Cybersecurity                                                                                          | 0   |

**Supplementary Figure 1: FDA medical device approval pathways**

| <b>Regulatory Pathways for Medical Devices in the United States</b>                                                                                                                                                                                                                                                                                                                                                                                                                                                                                                                                                                                                                                                                                                                                                                                                                                                                                                                                                                                                                                                                                                                        |                                                                                                                            |                                                                                          |
|--------------------------------------------------------------------------------------------------------------------------------------------------------------------------------------------------------------------------------------------------------------------------------------------------------------------------------------------------------------------------------------------------------------------------------------------------------------------------------------------------------------------------------------------------------------------------------------------------------------------------------------------------------------------------------------------------------------------------------------------------------------------------------------------------------------------------------------------------------------------------------------------------------------------------------------------------------------------------------------------------------------------------------------------------------------------------------------------------------------------------------------------------------------------------------------------|----------------------------------------------------------------------------------------------------------------------------|------------------------------------------------------------------------------------------|
| Pathway                                                                                                                                                                                                                                                                                                                                                                                                                                                                                                                                                                                                                                                                                                                                                                                                                                                                                                                                                                                                                                                                                                                                                                                    | 510(k)<br>(Premarket Notification)                                                                                         | PMA<br>(Premarket Approval)                                                              |
| Products                                                                                                                                                                                                                                                                                                                                                                                                                                                                                                                                                                                                                                                                                                                                                                                                                                                                                                                                                                                                                                                                                                                                                                                   | Typically moderate-risk ("class II") devices                                                                               | Typically high-risk ("class III") devices                                                |
| Requirements                                                                                                                                                                                                                                                                                                                                                                                                                                                                                                                                                                                                                                                                                                                                                                                                                                                                                                                                                                                                                                                                                                                                                                               | Typically do not necessitate full clinical trials, but require evidence of "substantial equivalence" to a predicate device | Typically require clinical trials to demonstrate a new device's safety and effectiveness |
| Product development time to market                                                                                                                                                                                                                                                                                                                                                                                                                                                                                                                                                                                                                                                                                                                                                                                                                                                                                                                                                                                                                                                                                                                                                         | 31 months                                                                                                                  | 54 months                                                                                |
| Sources:                                                                                                                                                                                                                                                                                                                                                                                                                                                                                                                                                                                                                                                                                                                                                                                                                                                                                                                                                                                                                                                                                                                                                                                   |                                                                                                                            |                                                                                          |
| <p>Maisel WH. Medical device regulation: an introduction for the practicing physician. <i>Annals of internal medicine</i>. 2004 Feb 17;140(4):296-302.<br/> <a href="https://www.fda.gov/MedicalDevices/DeviceRegulationandGuidance/HowtoMarketYourDevice/PremarketSubmissions/PremarketNotification510k">https://www.fda.gov/MedicalDevices/DeviceRegulationandGuidance/HowtoMarketYourDevice/PremarketSubmissions/PremarketNotification510k</a><br/> <a href="https://www.fda.gov/medicaldevices/deviceregulationandguidance/howtomarketyourdevice/premarket submissions/premarketapprovalpma">https://www.fda.gov/medicaldevices/deviceregulationandguidance/howtomarketyourdevice/premarket submissions/premarketapprovalpma</a></p> <p>Makower J, Meer A, Denend L. FDA impact on US medical technology innovation: a survey of over 200 medical technology companies. <i>Advanced Medical Technology Association</i>, Washington, DC, available at: <a href="http://www.advamed.org/NR/rdonlyres/040E6C33-380B-4F6B-AB58-9AB1C0A7A3CF/0/makowerreportfinal.pdf">http://www.advamed.org/NR/rdonlyres/040E6C33-380B-4F6B-AB58-9AB1C0A7A3CF/0/makowerreportfinal.pdf</a>. 2010 Nov.</p> |                                                                                                                            |                                                                                          |

Supplementary Figure 2: comparison of main results using alternative method of identifying the software sample

### Share of devices with cybersecurity content: considering alternate definition of "software sample"

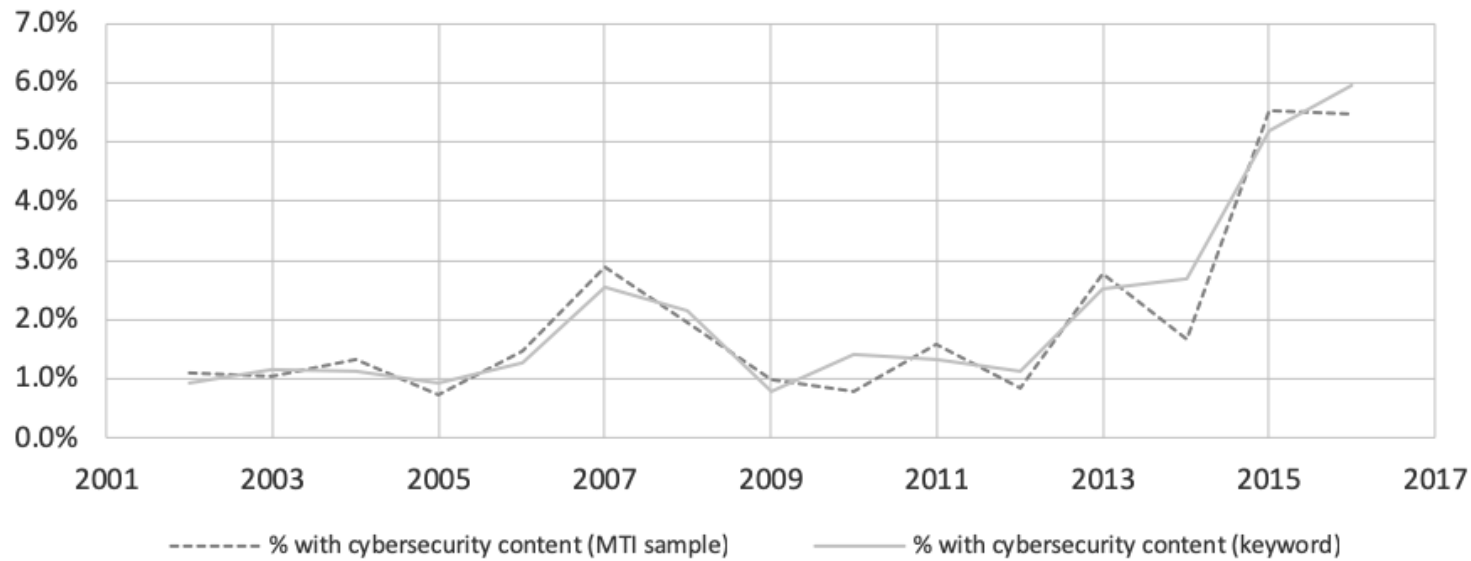

Supplement: bmjopen-2018-025374supp001.pdf [file bmjopen-2018-025374supp001.pdf]
